# Supplementary material for: Knockout of Vdac1 activates hypoxia-inducible factor through reactive oxygen species generation and induces tumor growth by promoting metabolic reprogramming and inflammation
Source: PubMed Central journal article supplement (PMC4551760; doi:10.1186/s40170-015-0133-5), 2015-08-26
Supplement: 40170_2015_133_MOESM2_ESM.pdf [file 40170_2015_133_MOESM2_ESM.pdf]

## A - Top Diseases & Functions

| Diseases and Bio Functions                            | z-score Nx | z-score Hx |
|-------------------------------------------------------|------------|------------|
| Accumulation of granulocytes                          | 2.26       | 0.00       |
| Activation of leukocytes                              | 2.10       | 0.91       |
| Activation of myeloid cells                           | 2.26       | 1.06       |
| Cancer                                                | 2.03       | 2.03       |
| Cell death of cancer cells                            | 0.00       | 2.38       |
| Chemotaxis of antigen presenting cells                | -0.37      | -2.05      |
| Digestive organ tumor                                 | 1.40       | 3.55       |
| Efflux of lipid                                       | 0.00       | -2.04      |
| Epithelial neoplasia                                  | 1.14       | 2.16       |
| Epithelial-mesenchymal transition of tumor cell lines | 0.00       | 2.03       |
| Fibrosis                                              | 2.00       | 0.49       |
| Flux of lipid                                         | 0.00       | -2.22      |
| Neoplasia of carcinoma cell lines                     | 0.00       | 2.43       |
| Neuromuscular disease                                 | -1.66      | -2.21      |
| Polarization of leukocytes                            | 2.01       | 0.00       |
| Quantity of bone marrow cells                         | 0.00       | -2.02      |
| Recruitment of leukocytes                             | -0.68      | -2.27      |
| Response of antigen presenting cells                  | -2.13      | 0.00       |
| Signaling of cells                                    | -2.07      | 0.00       |
| Signaling of tumor cell lines                         | -2.22      | 0.00       |
| Transmigration of cells                               | 0.00       | -2.44      |

## B - Top Canonical pathways

| Canonical Pathway                                    | p-val Nx | p-val Hx |
|------------------------------------------------------|----------|----------|
| Acute Phase Response Signaling                       | 1.05     | 2.22     |
| Agranulocyte Adhesion and Diapedesis                 | 3.41     | 1.80     |
| Atherosclerosis Signaling                            | 3.54     | 1.35     |
| Bladder Cancer Signaling                             | 2.71     | 1.63     |
| Dopamine Degradation                                 | 2.40     | 0.58     |
| Ethanol Degradation IV                               | 2.58     | 1.24     |
| Fatty Acid alpha oxidation                           | 3.02     | 0.82     |
| Granulocyte Adhesion and Diapedesis                  | 4.86     | 3.27     |
| Guanine and Guanosine Salvage I                      | 1.18     | 2.61     |
| Guanosine Nucleotides Degradation III                | 0.47     | 2.66     |
| HIF1 alpha Signaling                                 | 1.77     | 2.03     |
| Histamine Degradation                                | 3.15     | 0.87     |
| Inhibition of Matrix Metalloproteases                | 2.88     | 2.04     |
| Leukocyte Extravasation Signaling                    | 2.31     | 0.82     |
| LPS/IL-1 Mediated Inhibition of RXR Function         | 3.85     | 1.13     |
| LXR/RXR Activation                                   | 2.44     | 2.11     |
| Neuroprotective Role of THOP1 in Alzheimer's Disease | 2.18     | 0.99     |
| Oxidative Ethanol Degradation III                    | 2.78     | 1.38     |
| Purine Nucleotides Degradation II (Aerobic)          | 0.36     | 2.07     |

|                                                                                |      |      |
|--------------------------------------------------------------------------------|------|------|
| Putrescine Degradation III                                                     | 2.78 | 0.73 |
| Retinoate Biosynthesis II                                                      | 1.01 | 2.15 |
| Role of Macrophages, Fibroblasts and Endothelial Cells in Rheumatoid Arthritis | 2.48 | 1.85 |
| Role of Osteoblasts, Osteoclasts and Chondrocytes in Rheumatoid Arthritis      | 3.09 | 2.35 |
| Tryptophan Degradation X                                                       | 2.78 | 0.73 |
| VDR/RXR Activation                                                             | 2.38 | 4.01 |

### C - Top Upstream regulators

| Upstream regulators | z-score Nx | z-score Hx |
|---------------------|------------|------------|
| AGT                 | -2.41      | -0.99      |
| BMP4                | -1.31      | -2.05      |
| BMP6                | -2.65      | -1.71      |
| CCL5                | 0.00       | -2.43      |
| CD40LG              | 2.10       | 0.00       |
| CDKN2A              | 0.00       | -2.25      |
| CSF2                | -0.02      | 3.41       |
| HGF                 | -2.16      | 0.88       |
| HIF1A               | 0.59       | 2.52       |
| HOXA9               | 2.00       | 0.00       |
| IFN Beta            | -1.23      | -2.39      |
| IFNB1               | -1.02      | -2.24      |
| IFNG                | 0.12       | -2.40      |
| IL17RA              | 2.00       | 0.00       |
| IRF7                | -0.41      | -2.54      |
| MEF2C               | 0.00       | 2.22       |
| MEOX2               | -2.41      | -0.52      |
| MLXIPL              | 0.00       | -2.21      |
| NFIC                | 0.00       | 2.00       |
| NFkB (complex)      | 2.67       | 1.56       |
| NFKBIA              | -1.56      | -2.18      |
| PDGF BB             | -1.80      | -2.69      |
| POU4F1              | -2.14      | 0.00       |
| RELA                | 2.06       | 1.08       |
| SATB1               | 1.20       | 2.24       |
| SOX2                | -2.00      | 0.00       |
| STAT1               | -0.36      | -2.11      |
| TAF4                | -0.92      | -2.16      |
| TCF3                | 0.00       | -2.89      |
| TGFB1               | -2.50      | -0.08      |
| Tnf (family)        | 2.24       | 2.02       |
| TNFSF12             | 2.15       | 0.78       |
| WNT5A               | -1.41      | -2.65      |

**Supplemental Table 1. Main biological functions associated with the alterations of *Vdac1*<sup>-/-</sup> MEF compared to Wt MEF (Wt) in normoxia (Nx) or hypoxia (Hx). (A, B, C, and D): Significant**

categories of **(A)** Diseases and functions **(B)** Canonical pathways and **(C)** Upstream regulators associated with the comparison of wild-type (Wt) and *Vdac1*<sup>-/-</sup> MEF in Nx or Hx using IPA™. Activation z-score (cut-off=2) or  $-\log_{10}$  p-value (cut-off=2) are represented.
