# Supplementary material for: Knockout of Vdac1 activates hypoxia-inducible factor through reactive oxygen species generation and induces tumor growth by promoting metabolic reprogramming and inflammation
Source: PubMed Central journal article supplement (PMC4551760; doi:10.1186/s40170-015-0133-5), 2015-08-26
Supplement: 40170_2015_133_MOESM3_ESM.pdf [file 40170_2015_133_MOESM3_ESM.pdf]

## A - Top Diseases & Functions

| Diseases and Bio Functions                      | z-score Wt | z-score <i>Vdac1</i> <sup>-/-</sup> |
|-------------------------------------------------|------------|-------------------------------------|
| Activation of myeloid cells                     | 0.00       | -2.70                               |
| Alignment of chromosomes                        | -2.33      | -2.55                               |
| Apoptosis of squamous cell carcinoma cell lines | 2.77       | 0.00                                |
| Association of chromatin                        | -2.79      | -2.61                               |
| Association of chromosome components            | -2.36      | -1.98                               |
| Autophagy of cells                              | 0.00       | 2.33                                |
| Cell death of fibroblast cell lines             | 2.29       | 1.88                                |
| Cell death of kidney cells                      | 2.61       | 1.94                                |
| Cell death of melanoma cell lines               | 0.00       | -2.00                               |
| Cell movement                                   | -3.26      | 0.00                                |
| Cell movement of phagocytes                     | 0.00       | -3.41                               |
| Cell movement of tumor cell lines               | -3.41      | 0.00                                |
| Cell survival                                   | -2.48      | -0.85                               |
| Cell transformation                             | -2.71      | 0.00                                |
| Cell viability                                  | -2.32      | -0.44                               |
| Cell viability of myeloma cell lines            | -3.05      | 0.00                                |
| Cell viability of tumor cell lines              | -2.46      | -0.61                               |
| Chemotaxis of myeloid cells                     | 0.00       | -2.87                               |
| Chemotaxis of phagocytes                        | 0.00       | -2.89                               |
| Chromosomal congression of chromosomes          | -2.43      | -2.22                               |
| Colony formation                                | -3.13      | -1.89                               |
| Colony formation of cells                       | -3.06      | -2.18                               |
| Colony formation of fibroblasts                 | -2.21      | 0.00                                |
| Colony formation of lung cancer cell lines      | 0.00       | -2.74                               |
| Colony formation of tumor cell lines            | -2.25      | -1.08                               |
| Cycling of centrosome                           | -2.73      | 0.00                                |
| Cytosis                                         | -1.58      | -2.01                               |
| Death of embryo                                 | 3.19       | 0.00                                |
| Differentiation of osteoblasts                  | -2.20      | 0.00                                |
| Double-stranded DNA break repair of cells       | -2.06      | 0.00                                |
| Entry into interphase                           | -2.47      | -2.19                               |
| Entry into interphase of oocytes                | -2.00      | -2.00                               |
| Entry into interphase of tumor cell lines       | -2.35      | 0.00                                |
| Entry into S phase                              | -2.02      | -1.47                               |
| Entry into S phase of tumor cell lines          | -2.81      | 0.00                                |
| Fibrogenesis                                    | 0.00       | -2.03                               |
| Fusion of atlas                                 | 2.24       | 0.00                                |
| Hematological neoplasia                         | 2.04       | 0.79                                |
| Inflammatory response                           | 0.00       | -2.65                               |
| Interphase                                      | -1.29      | -2.04                               |
| Invasion of breast cancer cell lines            | -2.14      | 0.00                                |
| Invasion of cells                               | -3.26      | -2.74                               |
| Invasion of tumor cell lines                    | -3.87      | -2.55                               |
| Liver cancer                                    | -2.25      | -0.01                               |
| Liver tumor                                     | -2.29      | -0.35                               |
| Lymphohematopoietic cancer                      | 2.24       | 1.11                                |

|                                               |       |       |
|-----------------------------------------------|-------|-------|
| Lymphoid cancer                               | 2.17  | 1.30  |
| Lymphomagenesis                               | 2.17  | 1.30  |
| M phase of tumor cell lines                   | -2.09 | -2.09 |
| Mammary tumor                                 | -2.59 | -0.92 |
| Metabolism of DNA                             | -2.27 | -1.51 |
| Metastasis                                    | -1.61 | -2.01 |
| Microtubule dynamics                          | -2.95 | 0.00  |
| Migration of cells                            | 0.00  | -3.61 |
| Migration of tumor cell lines                 | 0.00  | -2.03 |
| Mitosis                                       | -2.26 | -0.81 |
| Necrosis of kidney                            | 2.15  | 1.60  |
| Necrosis of muscle                            | -0.24 | -2.03 |
| Oligodactyly                                  | 2.62  | 0.00  |
| Organismal death                              | 0.00  | 2.10  |
| Organization of cytoplasm                     | -2.82 | 0.00  |
| Organization of cytoskeleton                  | -2.79 | 0.00  |
| Orientation of chromosomes                    | -2.33 | 0.00  |
| Premature senescence of fibroblasts           | 2.24  | 0.00  |
| Proliferation of breast cancer cell lines     | -2.58 | 0.00  |
| Proliferation of cells                        | -5.14 | 0.00  |
| Proliferation of connective tissue cells      | -3.33 | 0.00  |
| Proliferation of fibroblasts                  | -3.17 | 0.00  |
| Proliferation of lung cancer cell lines       | -3.88 | 0.00  |
| Proliferation of pancreatic cancer cell lines | -2.88 | 0.00  |
| Proliferation of tumor cell lines             | -4.78 | 0.00  |
| Repair of cells                               | -3.05 | 0.00  |
| S phase of bone cancer cell lines             | -2.20 | 0.00  |
| S phase of fibroblast cell lines              | 0.00  | -2.18 |
| S phase of tumor cell lines                   | -2.65 | -2.68 |
| Senescence of fibroblasts                     | 2.22  | 0.00  |
| Size of embryo                                | -5.23 | 0.00  |
| Transformation of fibroblast cell lines       | -2.90 | -0.40 |

## B - Top Canonical pathways

| Canonical Pathway                                          | p-val Wt | p-val <i>Vdac1</i> <sup>-/-</sup> |
|------------------------------------------------------------|----------|-----------------------------------|
| 5-aminoimidazole Ribonucleotide Biosynthesis               | 0.70     | 2.89                              |
| Acute Phase Response Signaling                             | 0.95     | 3.02                              |
| ATM Signaling                                              | 3.73     | 2.52                              |
| Cell Cycle Control of Chromosomal Replication              | 6.16     | 2.31                              |
| Cell Cycle: G2/M DNA Damage Checkpoint Regulation          | 5.35     | 2.89                              |
| Cyclins and Cell Cycle Regulation                          | 3.16     | 1.91                              |
| DNA Double-Strand Break Repair by Homologous Recombination | 3.61     | 1.24                              |
| Estrogen-mediated S-phase Entry                            | 3.75     | 2.55                              |
| Folate Polyglutamylation                                   | 1.35     | 3.20                              |
| Folate Transformations I                                   | 0.88     | 2.89                              |
| GADD45 Signaling                                           | 2.13     | 2.72                              |
| GDP-L-fucose Biosynthesis II (from L-fucose)               | 2.29     | 0.00                              |

|                                                             |      |      |
|-------------------------------------------------------------|------|------|
| Gluconeogenesis I                                           | 0.65 | 2.05 |
| Glutathione Biosynthesis                                    | 0.00 | 2.89 |
| Glutathione-mediated Detoxification                         | 0.00 | 2.68 |
| Glycolysis I                                                | 1.75 | 2.16 |
| Hereditary Breast Cancer Signaling                          | 4.01 | 1.56 |
| HIF1alpha Signaling                                         | 0.00 | 2.41 |
| IL-6 Signaling                                              | 0.73 | 2.02 |
| Mismatch Repair in Eukaryotes                               | 4.21 | 1.63 |
| Mitotic Roles of Polo-Like Kinase                           | 6.83 | 1.53 |
| NRF2-mediated Oxidative Stress Response                     | 0.78 | 2.83 |
| p38 MAPK Signaling                                          | 0.78 | 2.48 |
| p53 Signaling                                               | 0.75 | 4.84 |
| Purine Nucleotides De Novo Biosynthesis II                  | 0.25 | 3.33 |
| RhoA Signaling                                              | 0.00 | 2.29 |
| Role of BRCA1 in DNA Damage Response                        | 4.81 | 2.37 |
| Role of CHK Proteins in Cell Cycle Checkpoint Control       | 3.53 | 0.94 |
| Role of Tissue Factor in Cancer                             | 0.00 | 3.06 |
| Salvage Pathways of Pyrimidine Deoxyribonucleotides         | 2.20 | 1.70 |
| Superpathway of Cholesterol Biosynthesis                    | 0.91 | 2.81 |
| Tetrahydrofolate Salvage from 5,10-methenyltetrahydrofolate | 0.51 | 3.20 |
| TR/RXR Activation                                           | 2.71 | 0.76 |
| tRNA Splicing                                               | 0.00 | 2.06 |

### C - Top Upstream regulators

| Upstream regulators | z-score Wt | z-score <i>Vdac1</i> <sup>-/-</sup> |
|---------------------|------------|-------------------------------------|
| Ap1                 | 0.00       | 2.10                                |
| ATF3                | 2.45       | 1.50                                |
| ATF4                | 2.37       | 1.69                                |
| CCND1               | -1.79      | -2.09                               |
| CDKN2A              | 4.95       | 3.43                                |
| CSF2                | -6.82      | -5.18                               |
| CTNN beta-TCF/LEF   | 0.00       | -2.00                               |
| Cyclin E            | -1.98      | -2.21                               |
| DDIT3               | 1.47       | 2.22                                |
| DTX1                | 0.00       | 2.24                                |
| E2f                 | -3.53      | -2.54                               |
| E2F1                | -3.53      | -1.87                               |
| E2F2                | -3.41      | -3.20                               |
| E2F3                | -2.96      | -3.12                               |
| EBF1                | 0.00       | -2.38                               |
| EIF4G2              | 0.00       | 2.24                                |
| Endothelin          | 0.00       | 2.00                                |
| EPAS1               | 4.00       | 3.58                                |
| ESRRG               | 2.17       | 1.60                                |
| F2RL1               | 0.00       | 2.18                                |
| FLI1                | -0.10      | -2.04                               |
| FOXL2               | 2.22       | -0.20                               |
| FOXM1               | -4.51      | -3.52                               |

|                  |       |       |
|------------------|-------|-------|
| FOXO1            | -2.05 | -0.54 |
| FOXO3            | 2.51  | 2.21  |
| FOXO4            | 0.95  | 2.22  |
| FZD9             | -1.98 | -2.41 |
| GRP              | -2.00 | 0.22  |
| Hdac             | -2.40 | -3.14 |
| HGF              | -4.47 | -2.96 |
| HIF1A            | 3.13  | 4.33  |
| HNF1A            | 3.05  | 0.00  |
| HNF4A            | 2.03  | 0.23  |
| HOXB3            | 0.00  | -2.00 |
| HTT              | -3.24 | -1.54 |
| Ifn              | -2.36 | -2.74 |
| IFN alpha/beta   | -3.28 | -4.33 |
| IFN Beta         | -2.12 | -3.77 |
| IFN type 1       | -2.91 | -3.64 |
| IFNA2            | -2.12 | -3.83 |
| IFNAR1           | -1.69 | -2.48 |
| IFNAR2           | -2.24 | -2.65 |
| IFNB1            | -0.81 | -2.90 |
| IFNG             | -0.55 | -2.29 |
| IFNK             | 0.00  | -2.00 |
| IFNL1            | -1.60 | -3.16 |
| IGF2BP1          | -2.45 | -1.63 |
| IL10             | 0.00  | 2.27  |
| IL13             | 0.00  | -2.75 |
| INHA             | 3.10  | 2.18  |
| Interferon alpha | -2.28 | -3.92 |
| IRF1             | -0.66 | -2.57 |
| IRF3             | -2.90 | -4.45 |
| IRF5             | -2.76 | -3.34 |
| IRF7             | -4.23 | -5.62 |
| JAG2             | 0.00  | 2.00  |
| JUN              | -1.83 | -2.45 |
| JUNB             | 1.12  | 2.07  |
| JUND             | -1.99 | -2.60 |
| KDM5B            | 3.57  | 3.79  |
| LEF1             | -2.37 | -1.84 |
| MAX              | -2.80 | -2.97 |
| MED1             | -2.36 | -1.87 |
| MEF2C            | 1.89  | 2.36  |
| MNT              | 0.00  | -2.24 |
| MYB              | -2.38 | -2.56 |
| MYBL2            | -2.44 | -2.64 |
| MYC              | -4.00 | -3.68 |
| NFKB1            | 2.53  | 0.52  |
| Notch            | 2.42  | 0.96  |
| NR1H3            | -2.07 | -0.42 |
| NR3C2            | -2.44 | -0.26 |
| NRG1             | 0.00  | 2.26  |

|         |       |       |
|---------|-------|-------|
| NUPR1   | 7.60  | 6.92  |
| PRL     | -2.98 | -2.83 |
| Rb      | 3.42  | 2.02  |
| RB1     | 4.24  | 3.15  |
| RBL1    | 3.62  | 2.02  |
| SIN3A   | 0.00  | -2.24 |
| SMAD2   | 1.38  | 2.64  |
| SMARCB1 | 2.29  | 1.16  |
| SPDEF   | 2.83  | 1.57  |
| SPP1    | -2.10 | -2.18 |
| SREBF2  | 0.00  | -2.31 |
| STAT1   | -2.03 | -4.74 |
| STAT2   | -1.46 | -2.81 |
| STAT4   | 3.30  | 5.70  |
| TCF3    | 3.30  | 2.96  |
| TFEB    | 0.00  | 2.43  |
| TGFB2   | -0.14 | 2.14  |
| TLR4    | -0.99 | -2.65 |
| TLX1    | -2.00 | 0.00  |
| TNFSF13 | 2.45  | 2.65  |
| TP53    | 4.22  | 1.23  |
| TRIM24  | 4.49  | 6.38  |
| Vegf    | -4.31 | -3.15 |

**Supplemental Table 2. Main biological functions associated with the comparison of hypoxic and normoxic conditions in Wt MEF or *Vdac1*<sup>-/-</sup> MEF.** (A, B, C, and D): Significant categories of (A) Diseases and functions (B) Canonical pathways and (C) Upstream regulators associated with the comparison of Normoxia (Nx) and hypoxia (Hx) in wild-type (Wt) or *Vdac1*<sup>-/-</sup> MEF in using IPA™. Activation z-score (cut-off=2) or -log<sub>10</sub> p-value (cut-off=2) are represented.
