# Supplementary material for: Knockout of Vdac1 activates hypoxia-inducible factor through reactive oxygen species generation and induces tumor growth by promoting metabolic reprogramming and inflammation
Source: PubMed Central journal article supplement (PMC4551760; doi:10.1186/s40170-015-0133-5), 2015-08-26
Supplement: 40170_2015_133_MOESM4_ESM.pdf [file 40170_2015_133_MOESM4_ESM.pdf]

|              |                  | Wt Hx/Nx     | <i>Vdac1</i> <sup>-/-</sup> Hx/Nx | Nx <i>Vdac1</i> <sup>-/-</sup> /Wt | Hx <i>Vdac1</i> <sup>-/-</sup> /Wt |              |
|--------------|------------------|--------------|-----------------------------------|------------------------------------|------------------------------------|--------------|
| Dusp1        | NM_013642        | 1.65         | 1.92                              |                                    | 0.14                               | 0.41         |
| Dusp2        | NM_010090        | -0.22        | -0.57                             |                                    | 0.43                               | 0.08         |
| Dusp3        | NM_028207        | 0.58         | 0.66                              |                                    | -0.01                              | 0.08         |
| Dusp4        | NM_176933        | 0.01         | 1.99                              |                                    | -1.44                              | 0.53         |
|              | NM_00108539      |              |                                   |                                    |                                    |              |
| Dusp5        | 0                | -0.39        | 0.00                              |                                    | -0.71                              | -0.32        |
| <b>Dusp6</b> | <b>NM_026268</b> | <b>-0.31</b> | <b>-1.26</b>                      |                                    | <b>-1.94</b>                       | <b>-2.89</b> |
| Dusp7        | NM_153459        | -0.83        | -0.84                             |                                    | 0.29                               | 0.29         |
| Dusp8        | NM_008748        | -0.52        | 0.05                              |                                    | 0.80                               | 1.37         |
| Dusp9        | NM_029352        | -0.84        | -1.48                             |                                    | -0.73                              | -1.37        |
| Dusp10       | NM_022019        | 0.65         | 1.25                              |                                    | -0.14                              | 0.45         |
| Dusp11       | NM_028099        | -0.77        | -0.46                             |                                    | 0.32                               | 0.62         |
| Dusp12       | NM_023173        | 0.43         | -0.09                             |                                    | 1.88                               | 1.36         |
|              | NM_00100726      |              |                                   |                                    |                                    |              |
| Dusp13       | 8                | 0.74         | 2.46                              |                                    | 0.68                               | 2.41         |
| Dusp14       | NM_019819        | -1.37        | 0.60                              |                                    | 1.26                               | 3.24         |
| Dusp15       | NM_145744        | 0.85         | -0.15                             |                                    | -0.08                              | -1.08        |
| Dusp16       | NM_130447        | 0.65         | 0.60                              |                                    | -0.02                              | -0.07        |
| Dusp18       | NM_173745        | -0.84        | -1.01                             |                                    | 0.61                               | 0.43         |
| Dusp19       | NM_024438        | 0.55         | -0.37                             |                                    | -0.26                              | -1.18        |
| Dusp21       | NM_028568        | -0.18        | 0.32                              |                                    | -0.23                              | 0.28         |
| Dusp22       | NM_134068        | 0.90         | -0.83                             |                                    | 0.78                               | -0.95        |
| Dusp23       | NM_026725        | 0.33         | -0.20                             |                                    | -1.86                              | -2.39        |
| Dusp26       | NM_025869        | 0.14         | -0.42                             |                                    | 0.81                               | 0.25         |
| Dusp28       | NM_175118        | 0.17         | -0.48                             |                                    | 0.90                               | 0.25         |

**Supplemental Table 3. Mus musculus dual specificity phosphatase (DUSP) mRNA levels associated with the comparison of hypoxic and normoxic conditions in Wt MEF or *Vdac1*<sup>-/-</sup> MEF.**
