# Supplementary material for: Knockout of Vdac1 activates hypoxia-inducible factor through reactive oxygen species generation and induces tumor growth by promoting metabolic reprogramming and inflammation
Source: PubMed Central journal article supplement (PMC4551760; doi:10.1186/s40170-015-0133-5), 2015-08-26
Supplement: 40170_2015_133_MOESM5_ESM.pdf [file 40170_2015_133_MOESM5_ESM.pdf]

|             |                  | Wt Hx/Nx     | <i>Vdac1</i> <sup>-/-</sup> Hx/Nx | Nx<br><i>Vdac1</i> <sup>-/-</sup> /Wt | Hx<br><i>Vdac1</i> <sup>-/-</sup> /Wt |
|-------------|------------------|--------------|-----------------------------------|---------------------------------------|---------------------------------------|
| Sod1        | NM_011434        | -0.07        | -0.24                             | -0.23                                 | -0.40                                 |
| Sod2        | NM_013671        | -0.72        | -1.00                             | -0.59                                 | -0.87                                 |
| Sod3        | NM_011435        | -1.68        | -2.87                             | 2.64                                  | 1.45                                  |
| Gpx1        | NM_008160        | -0.12        | -0.37                             | -0.64                                 | -0.89                                 |
| Gpx2        | NM_030677        | -0.10        | 0.36                              | -0.62                                 | -0.17                                 |
| Gpx3        | NM_008161        | -0.25        | -0.15                             | -1.21                                 | -1.11                                 |
| Gpx4        | NM_001037741     | -0.20        | 0.15                              | 0.40                                  | 0.75                                  |
| Gpx5        | NM_010343        | -0.16        | -0.09                             | -0.09                                 | -0.02                                 |
| Gpx6        | NM_145451        | 0.20         | 0.19                              | 0.00                                  | -0.01                                 |
| <b>Gpx7</b> | <b>NM_024198</b> | <b>-0.77</b> | <b>0.14</b>                       | <b>-5.88</b>                          | <b>-4.98</b>                          |
| Gpx8        | NM_027127        | 0.19         | -0.46                             | 0.72                                  | 0.07                                  |
| Cat         | NM_009804        | 1.23         | 0.62                              | -0.41                                 | -1.02                                 |

**Supplemental Table 4. Mus musculus superoxide dismutase (Sod), glutathione peroxidase (GPX) and catalase (Cat) mRNA levels associated with the comparison of hypoxic and normoxic conditions in Wt MEF or *Vdac1*<sup>-/-</sup> MEF.**
