# Supplementary material for: Knockout of Vdac1 activates hypoxia-inducible factor through reactive oxygen species generation and induces tumor growth by promoting metabolic reprogramming and inflammation
Source: PubMed Central journal article supplement (PMC4551760; doi:10.1186/s40170-015-0133-5), 2015-08-26
Supplement: 40170_2015_133_MOESM7_ESM.pdf [file 40170_2015_133_MOESM7_ESM.pdf]

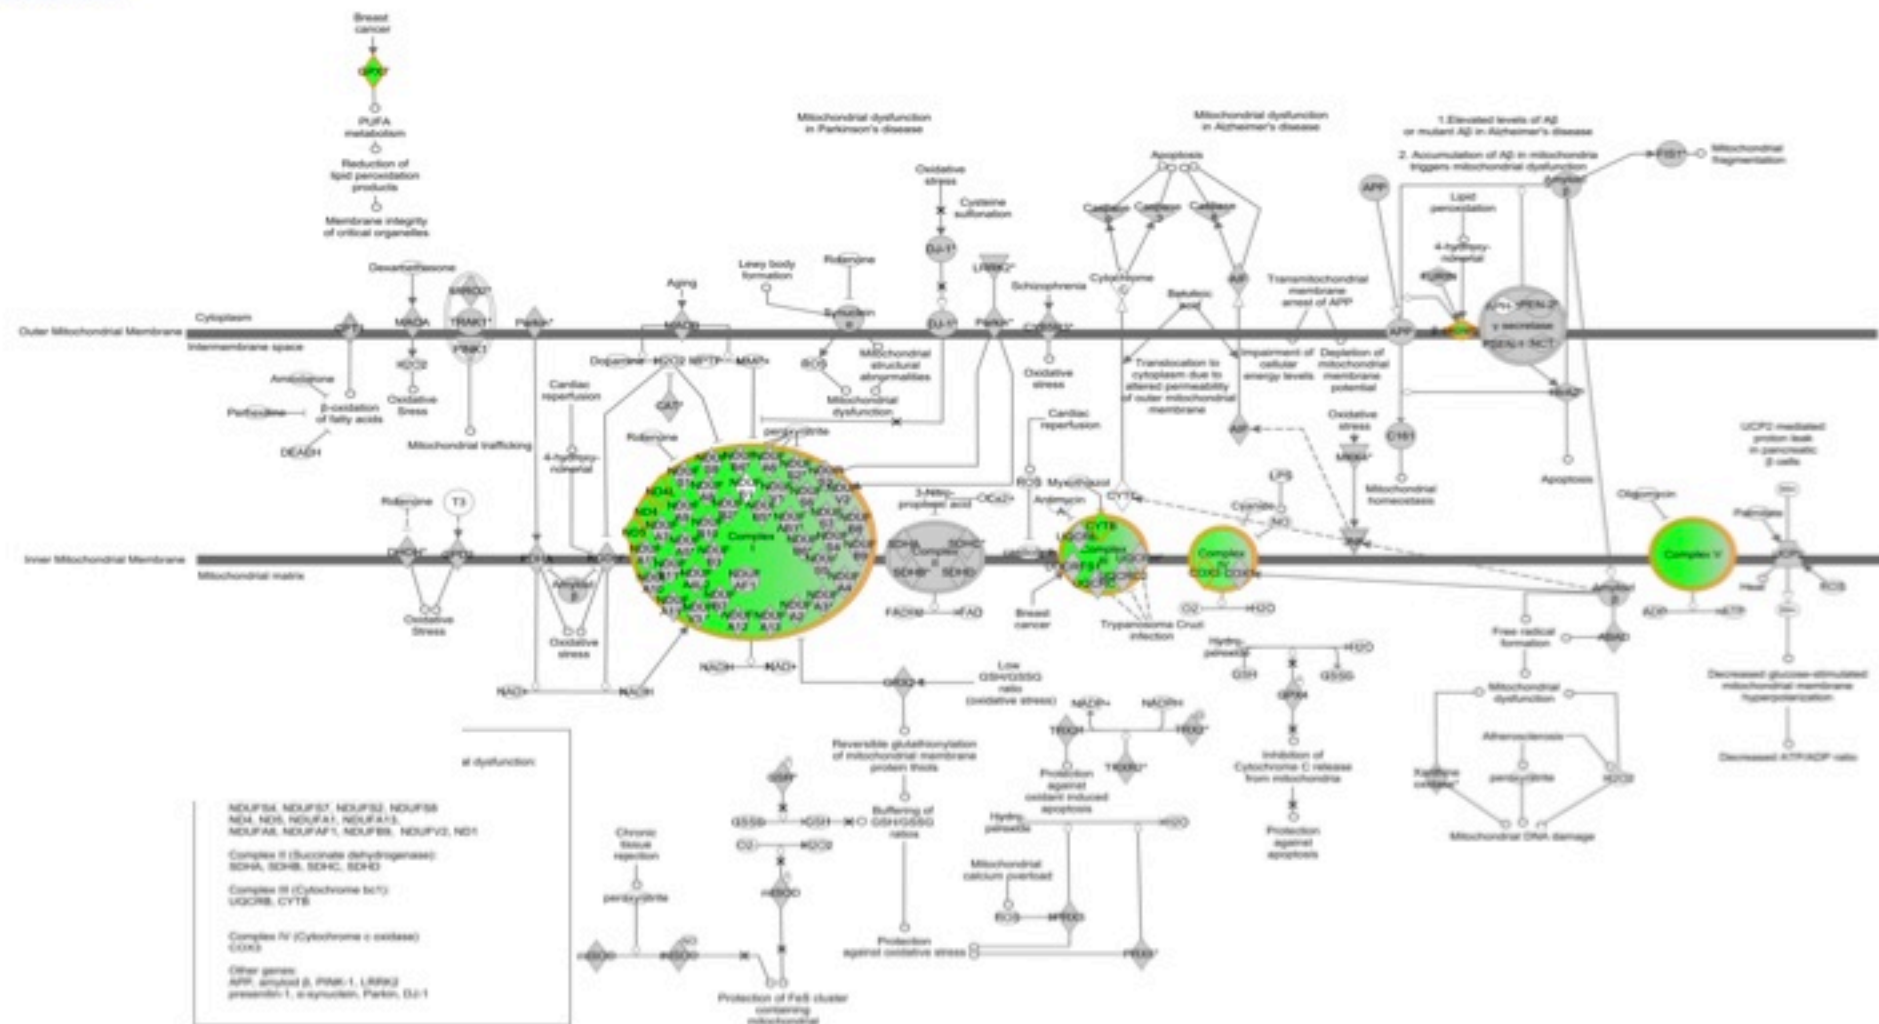

**Supplemental Figure S2. Perturbations in OXPHOS in *Vdac1*<sup>-/-</sup> MEF.** Ingenuity Pathway Analysis of the OXPHOX in *Vdac1*<sup>-/-</sup> vs Wt MEF in Nx and Hx. Green color codes for down-regulation.
