# Supplementary material for: Knockout of Vdac1 activates hypoxia-inducible factor through reactive oxygen species generation and induces tumor growth by promoting metabolic reprogramming and inflammation
Source: PubMed Central journal article supplement (PMC4551760; doi:10.1186/s40170-015-0133-5), 2015-08-26
Supplement: 40170_2015_133_MOESM8_ESM.pdf [file 40170_2015_133_MOESM8_ESM.pdf]

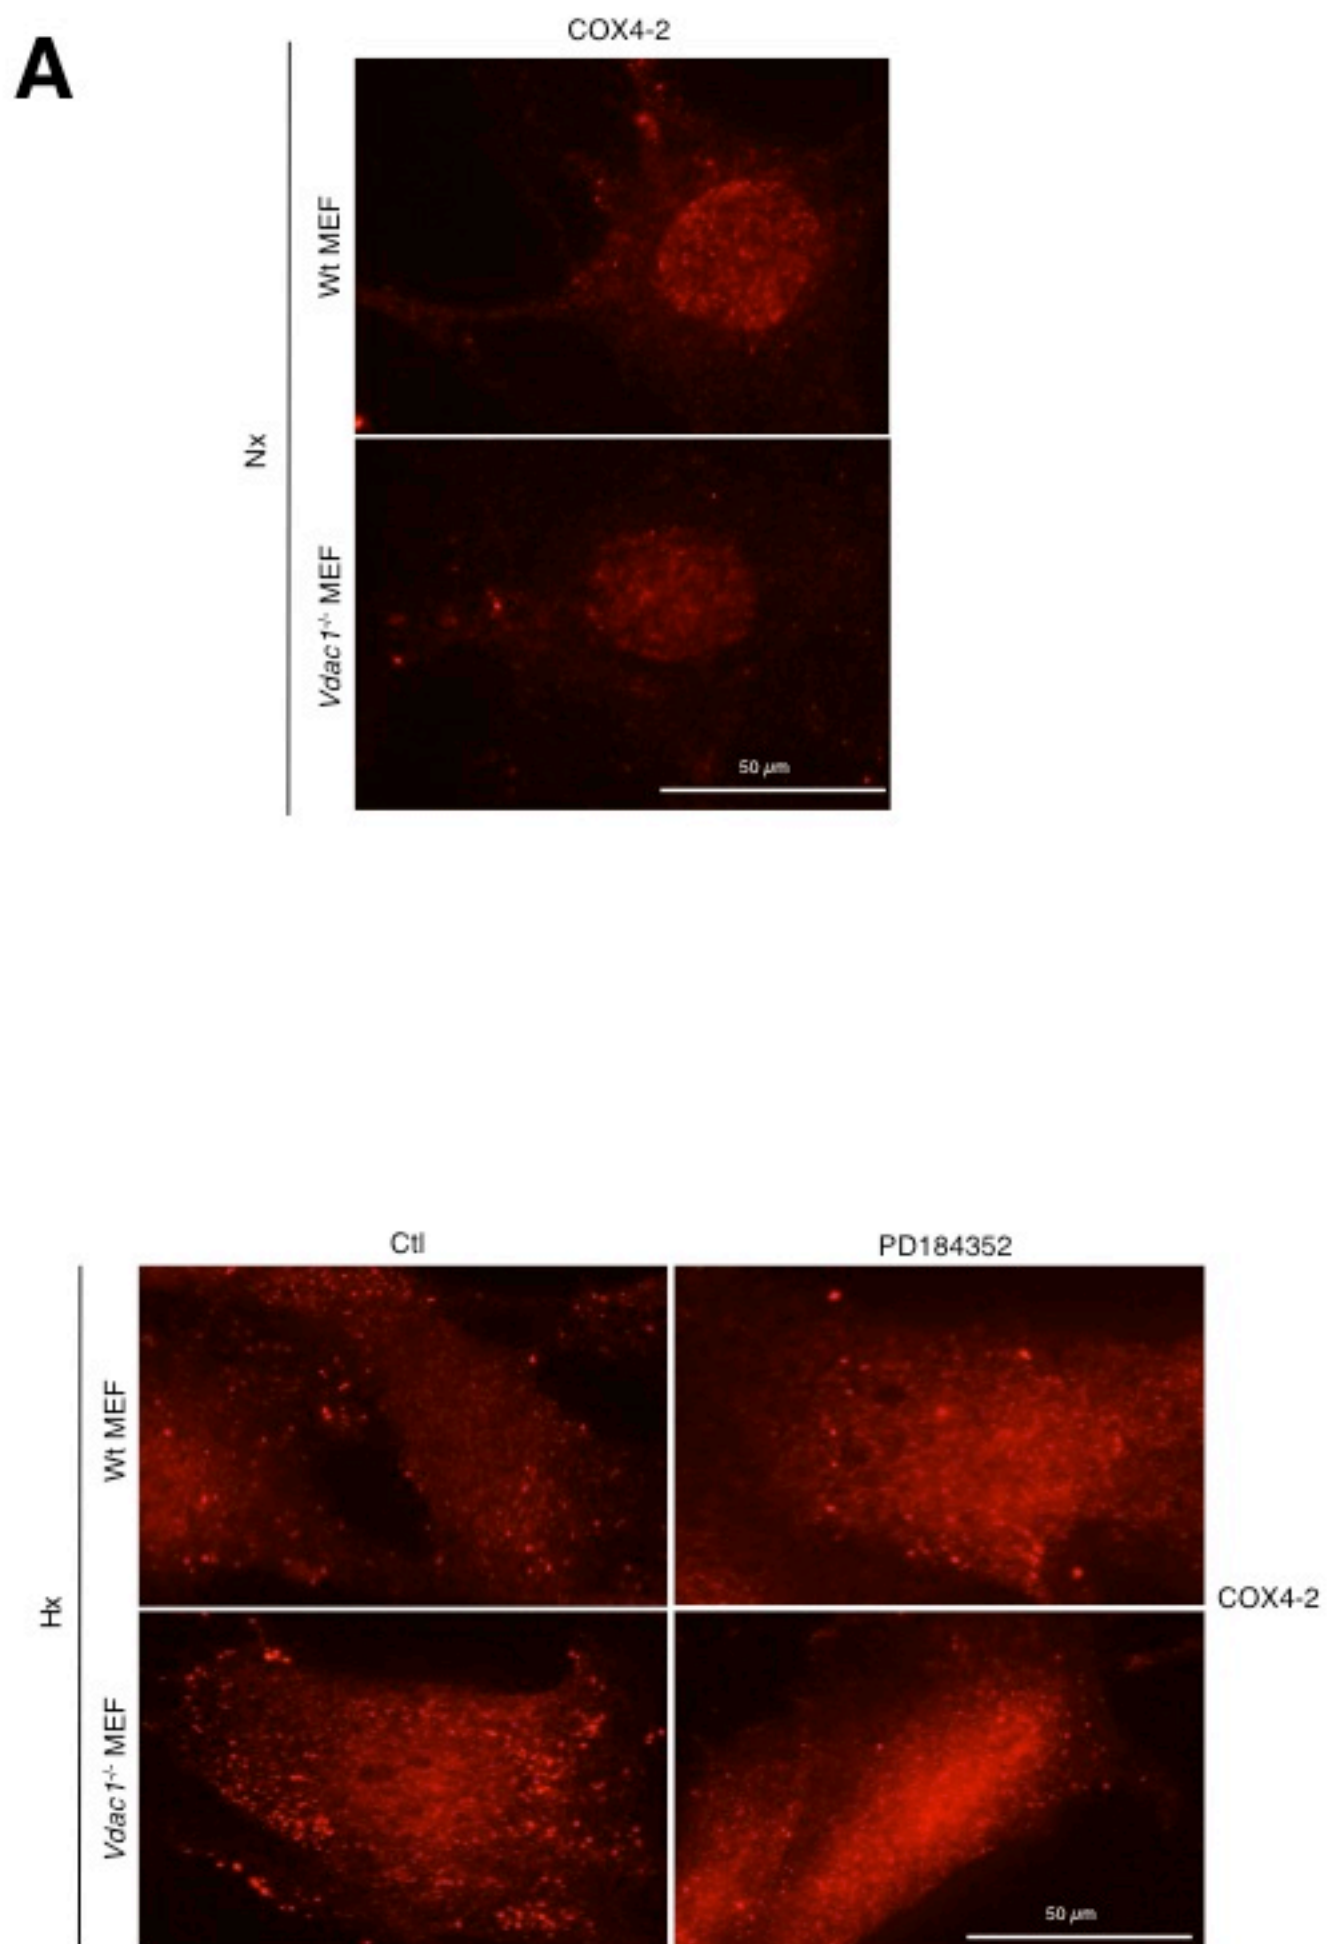

**Supplemental Figure S3. Cytochrome oxidase expression: (A)** Immunofluorescence to COX4-2 in Wt and *Vdac1*<sup>-/-</sup> MEF in Nx for 72h and **(B)** COX4-2 in Wt and *Vdac1*<sup>-/-</sup> MEF in Hx for 72h in the absence (Ctl) or presence of the MEK inhibitor (PD184352) .
