# Supplementary material for: Knockout of Vdac1 activates hypoxia-inducible factor through reactive oxygen species generation and induces tumor growth by promoting metabolic reprogramming and inflammation
Source: PubMed Central journal article supplement (PMC4551760; doi:10.1186/s40170-015-0133-5), 2015-08-26
Supplement: 40170_2015_133_MOESM9_ESM.pdf [file 40170_2015_133_MOESM9_ESM.pdf]

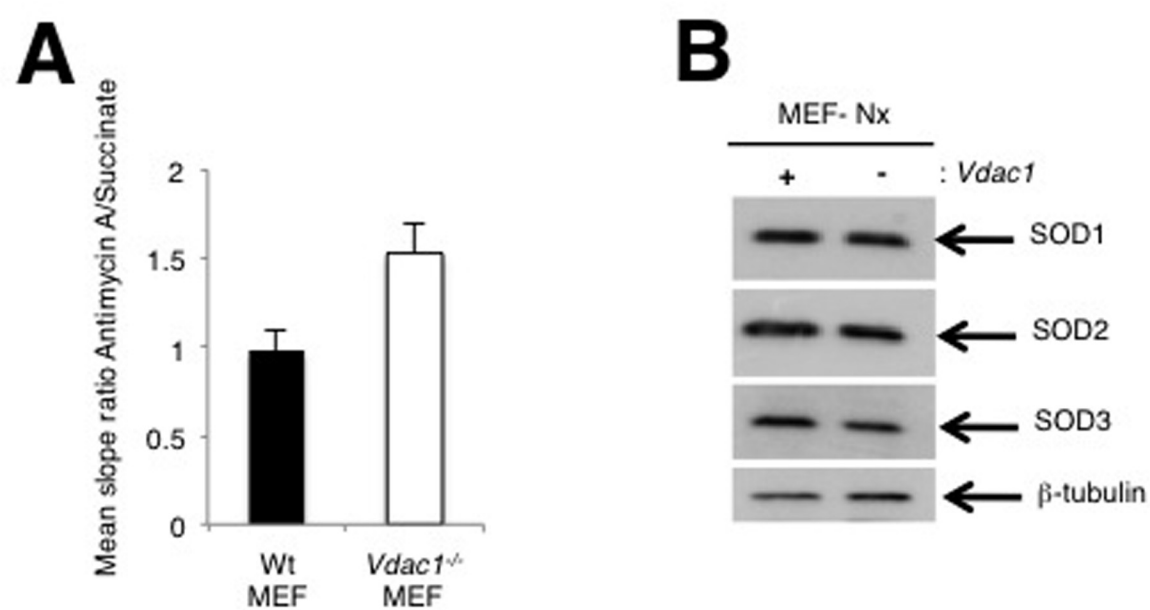

**Supplemental Figure S4. Reactive oxygen species status of Wt and *Vdac1*<sup>-/-</sup> MEF. (A)** Mitochondrial hydrogen peroxide production. **(B)** Immunoblotting for SOD1, SOD2 and SOD3 of Wt (+) and *Vdac1*<sup>-/-</sup> (-) MEF incubated in normoxia or hypoxia for 72h.  $\beta$ -tubulin was used as a loading control.
