# Supplementary material for: Knockout of Vdac1 activates hypoxia-inducible factor through reactive oxygen species generation and induces tumor growth by promoting metabolic reprogramming and inflammation
Source: PubMed Central journal article supplement (PMC4551760; doi:10.1186/s40170-015-0133-5), 2015-08-26
Supplement: 40170_2015_133_MOESM10_ESM.pdf [file 40170_2015_133_MOESM10_ESM.pdf]

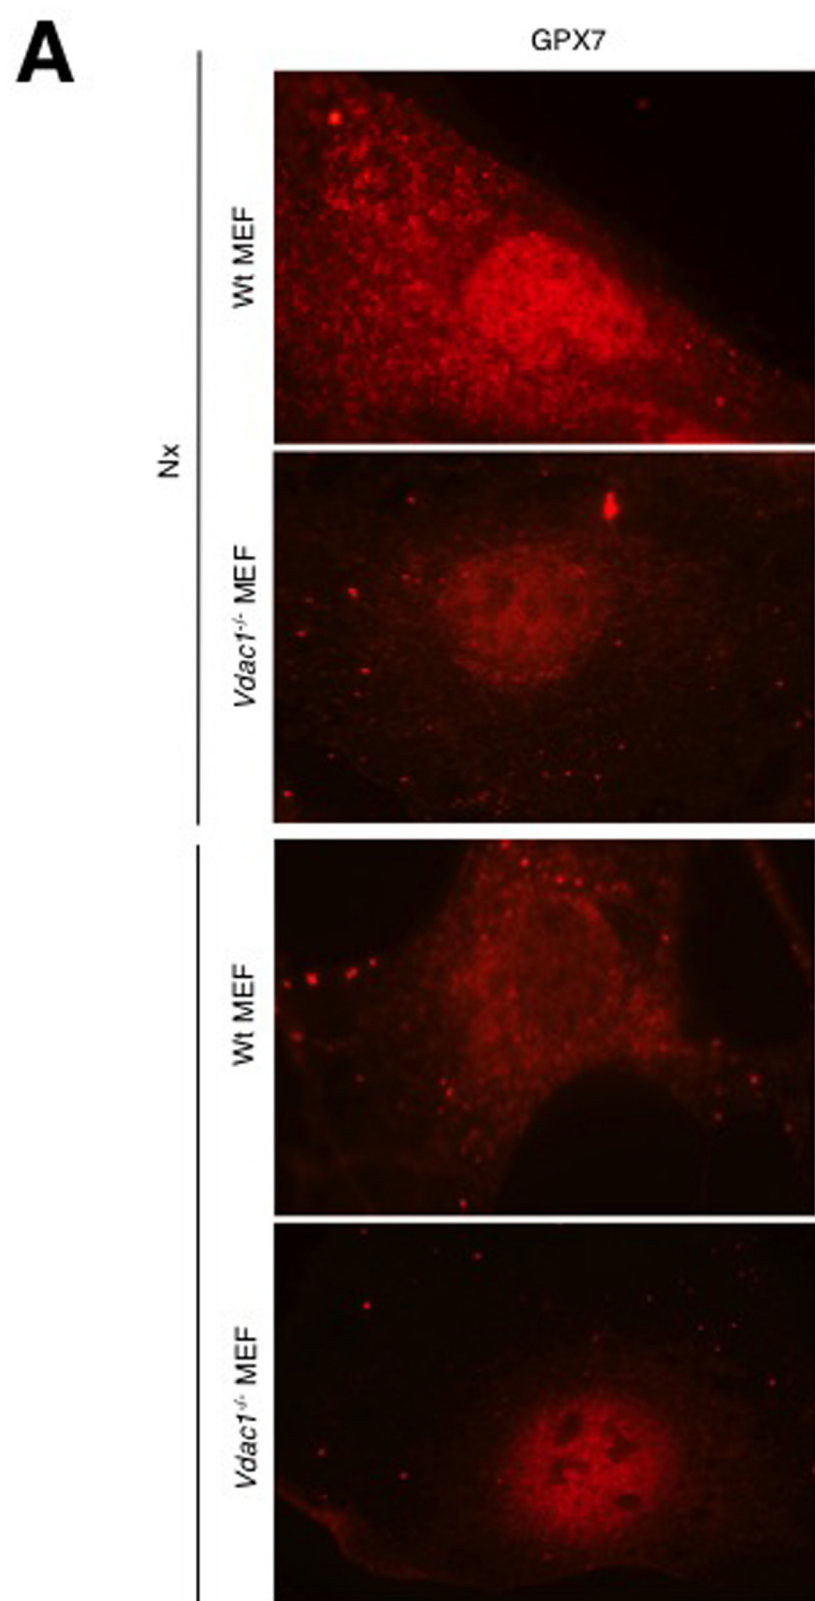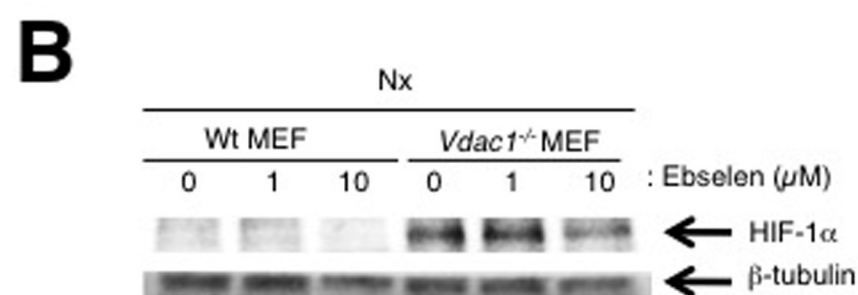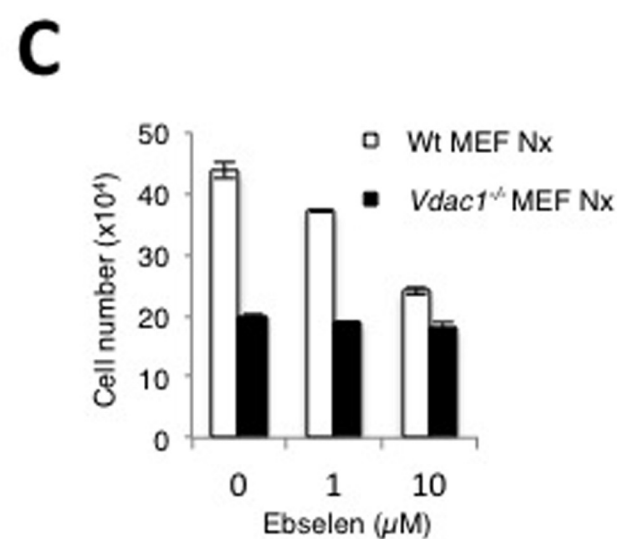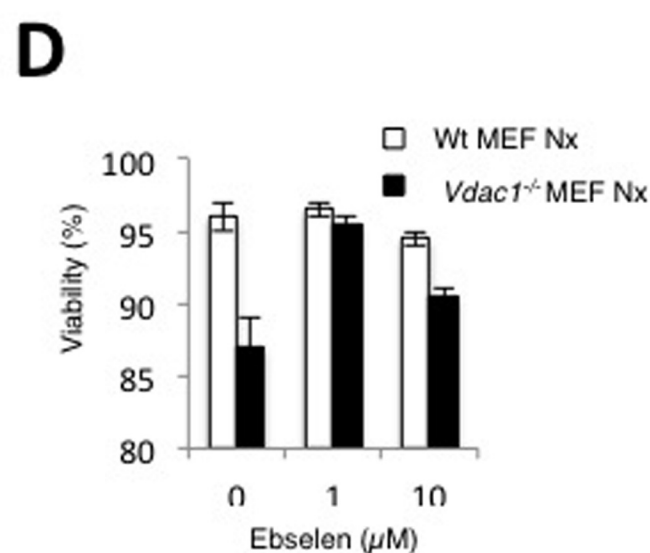

**Supplemental Figure S5. Glutathione peroxidase expression and the effect of ebselen. (A)** Immunofluorescence to GPX7 in Wt and *Vdac1*<sup>-/-</sup> MEF in Nx or Hx for 72h, **(B)** Immunoblotting for HIF-1 $\alpha$  of Wt and *Vdac1*<sup>-/-</sup> MEF in the absence or presence of ebselen in normoxia. **(C)** Proliferation of Wt and *Vdac1*<sup>-/-</sup> MEF in the absence or presence of ebselen in normoxia. **(D)** Viability of Wt and *Vdac1*<sup>-/-</sup> MEF in the absence or presence of ebselen in normoxia.
