# Supplementary material for: Knockout of Vdac1 activates hypoxia-inducible factor through reactive oxygen species generation and induces tumor growth by promoting metabolic reprogramming and inflammation
Source: PubMed Central journal article supplement (PMC4551760; doi:10.1186/s40170-015-0133-5), 2015-08-26
Supplement: 40170_2015_133_MOESM11_ESM.pdf [file 40170_2015_133_MOESM11_ESM.pdf]

**A**

## Glycolysis Nx

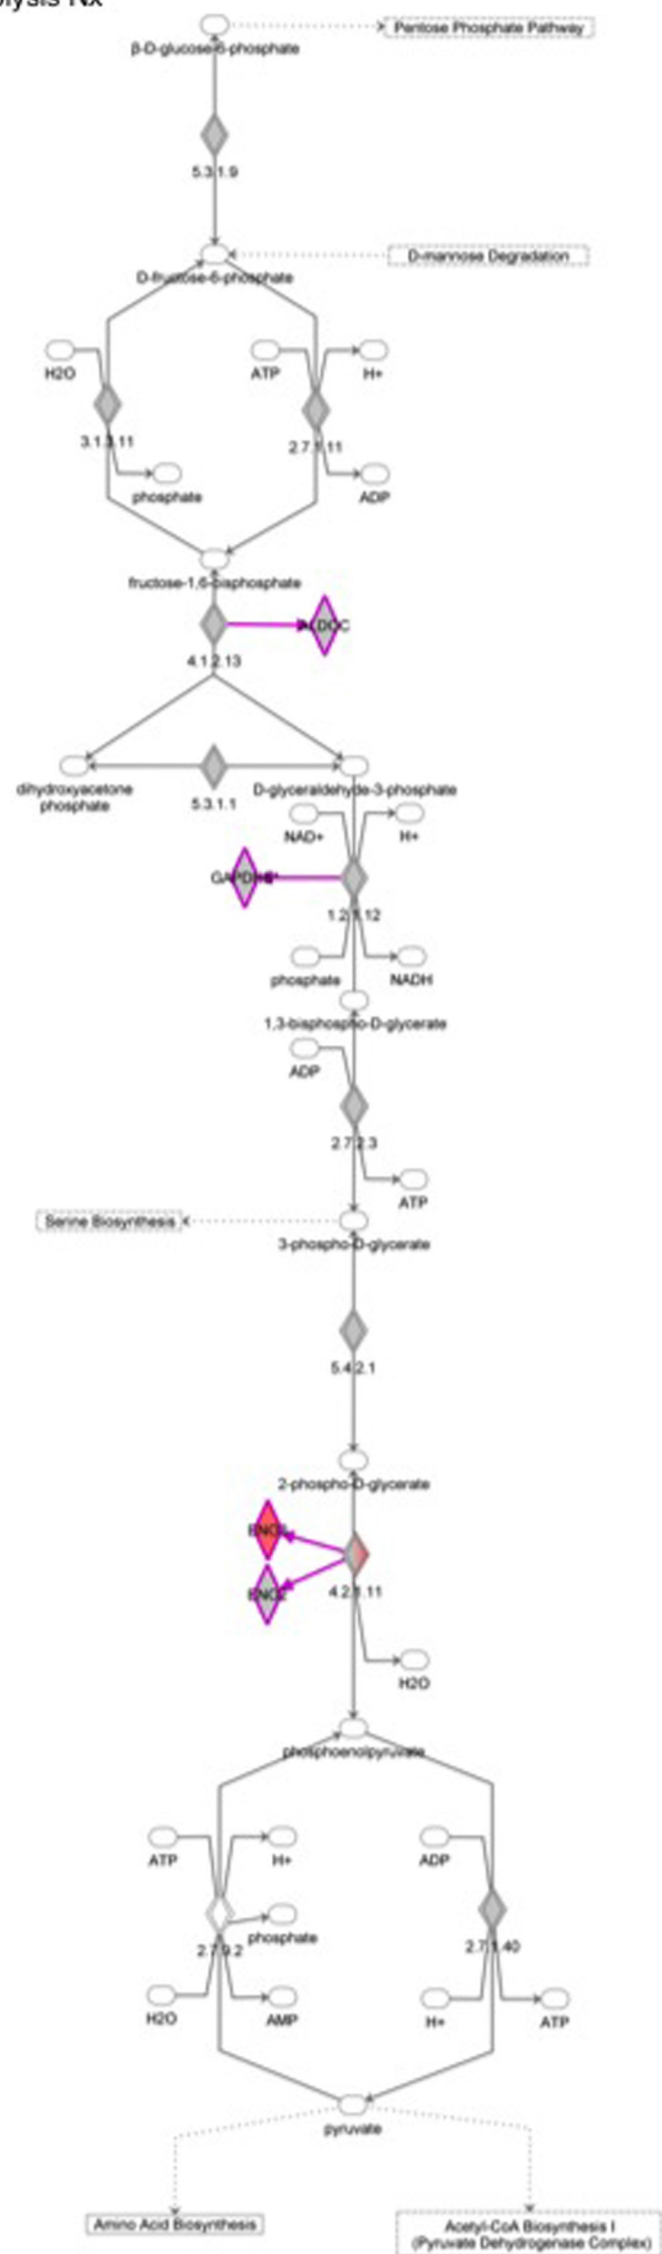**B**

## Glycolysis Hx

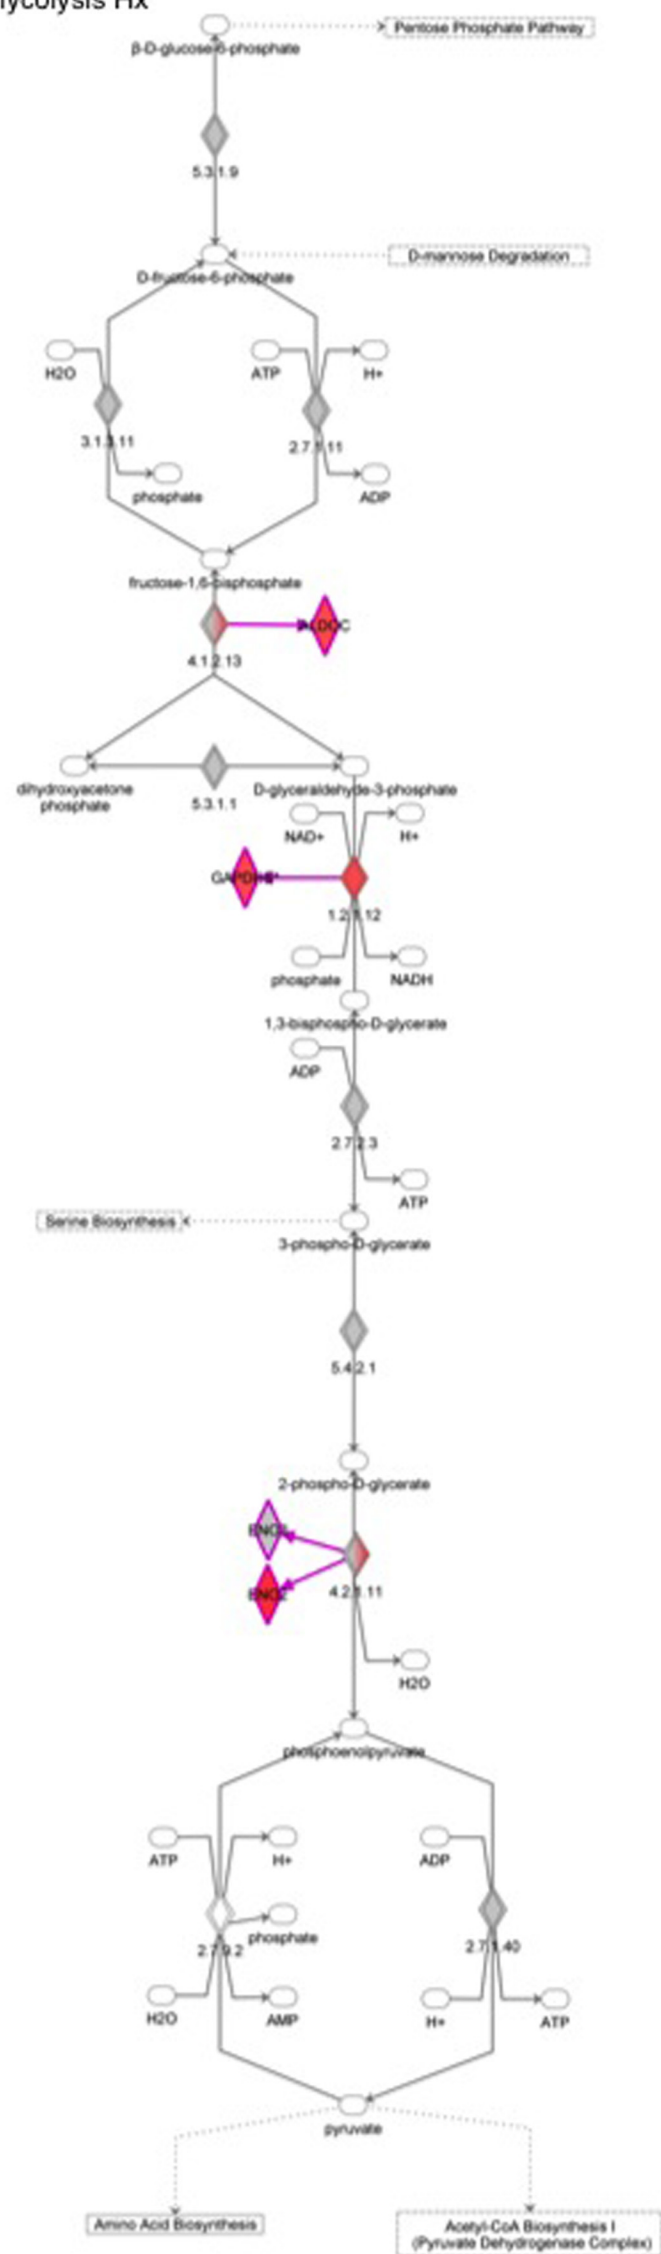

**Supplemental Figure S6. Changes in metabolic pathways in *Vdac1*<sup>-/-</sup> vs Wt MEF. (A and B) Ingenuity Pathway Analysis of the metabolic activity of *Vdac1*<sup>-/-</sup> vs Wt MEF in (A) normoxia and (B) hypoxia. Red color code for up-regulation**
