# Supplementary material for: Knockout of Vdac1 activates hypoxia-inducible factor through reactive oxygen species generation and induces tumor growth by promoting metabolic reprogramming and inflammation
Source: PubMed Central journal article supplement (PMC4551760; doi:10.1186/s40170-015-0133-5), 2015-08-26
Supplement: 40170_2015_133_MOESM12_ESM.pdf [file 40170_2015_133_MOESM12_ESM.pdf]

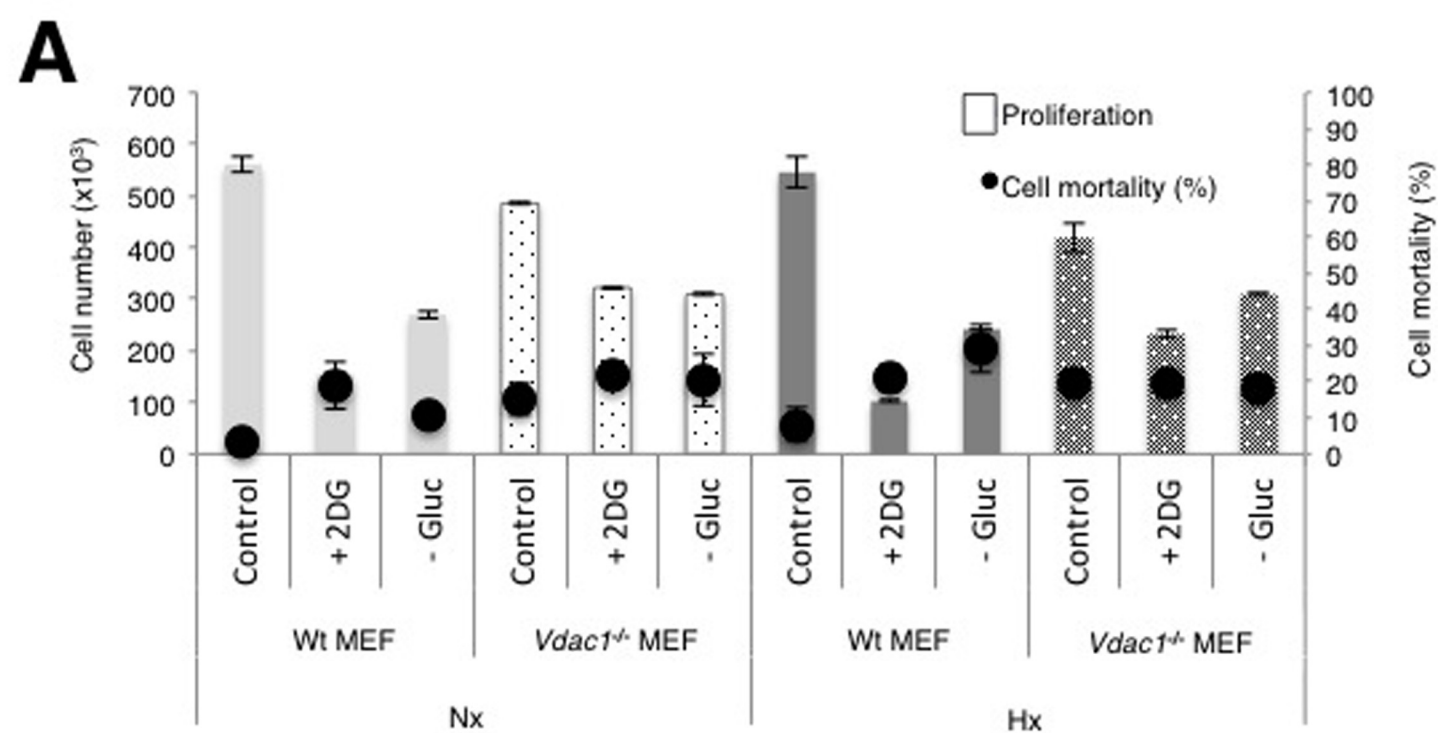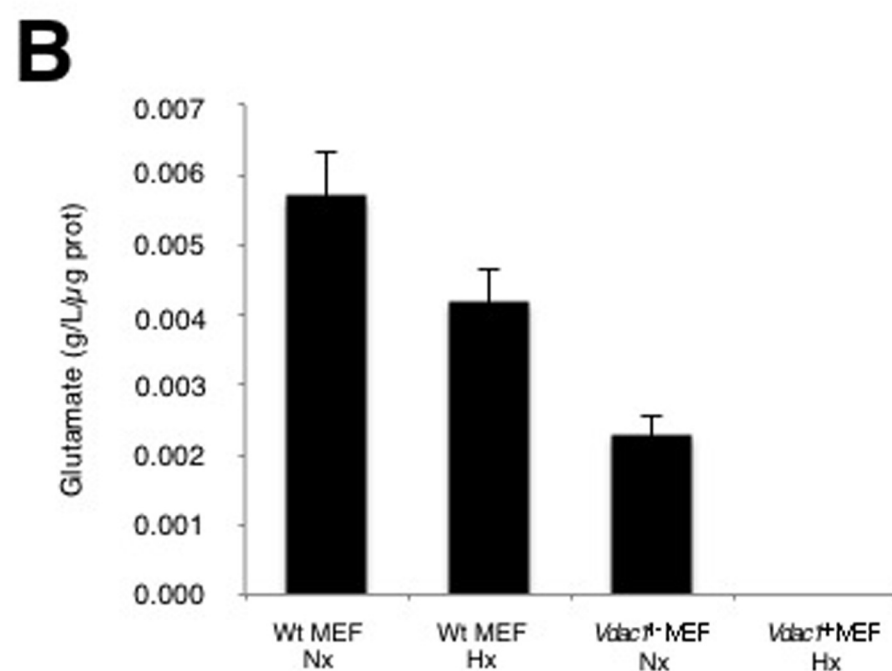

**Supplemental Figure S7. Glucose and glutamine metabolism.** (A) Wt and *Vdac1*<sup>-/-</sup> MEF were cultured for two days in Nx or Hx in the presence of 2-deoxy-D-glucose (2DG– 1μM) or without glucose (- Gluc). The cell number was measured on a Beckman Coulter apparatus (squares). The percentage of cell mortality was measured by trypan blue exclusion (black dots). The mean ±SEM is representative of two independent experiments carried out in duplicate. (B) The glutamate concentration in the media of Wt and *Vdac1*<sup>-/-</sup> MEF cultured in normoxia (Nx) or hypoxia 1% O<sub>2</sub> (Hx) was measured at day 7 using a YSI 2700 apparatus. *Vdac1*<sup>-/-</sup> MEF convert little or no glutamine into glutamate compared to Wt MEF.
