# Supplementary material for: Knockout of Vdac1 activates hypoxia-inducible factor through reactive oxygen species generation and induces tumor growth by promoting metabolic reprogramming and inflammation
Source: PubMed Central journal article supplement (PMC4551760; doi:10.1186/s40170-015-0133-5), 2015-08-26
Supplement: 40170_2015_133_MOESM13_ESM.pdf [file 40170_2015_133_MOESM13_ESM.pdf]

Nx

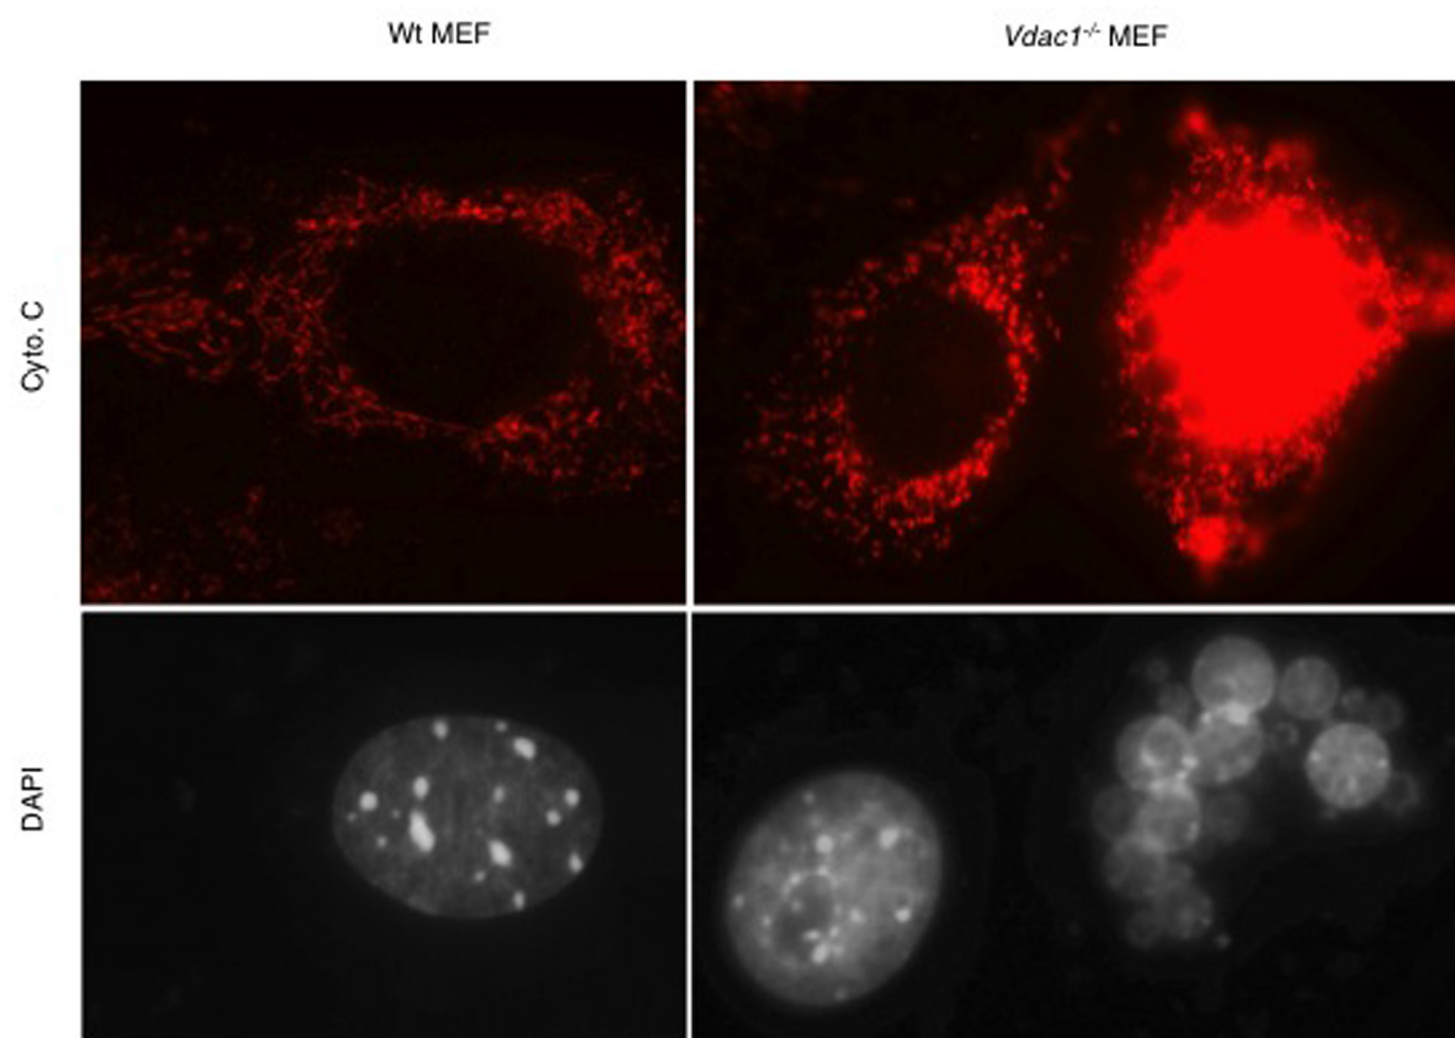

**Supplementary Figure S8. Knockout of *Vdac1* significantly disrupted apoptosis.** Immunofluorescence to cytochrome C and DAPI in Wt and *Vdac1*<sup>-/-</sup> MEF in Nx.
