# Supplementary material for: Knockout of Vdac1 activates hypoxia-inducible factor through reactive oxygen species generation and induces tumor growth by promoting metabolic reprogramming and inflammation
Source: PubMed Central journal article supplement (PMC4551760; doi:10.1186/s40170-015-0133-5), 2015-08-26
Supplement: 40170_2015_133_MOESM14_ESM.pdf [file 40170_2015_133_MOESM14_ESM.pdf]

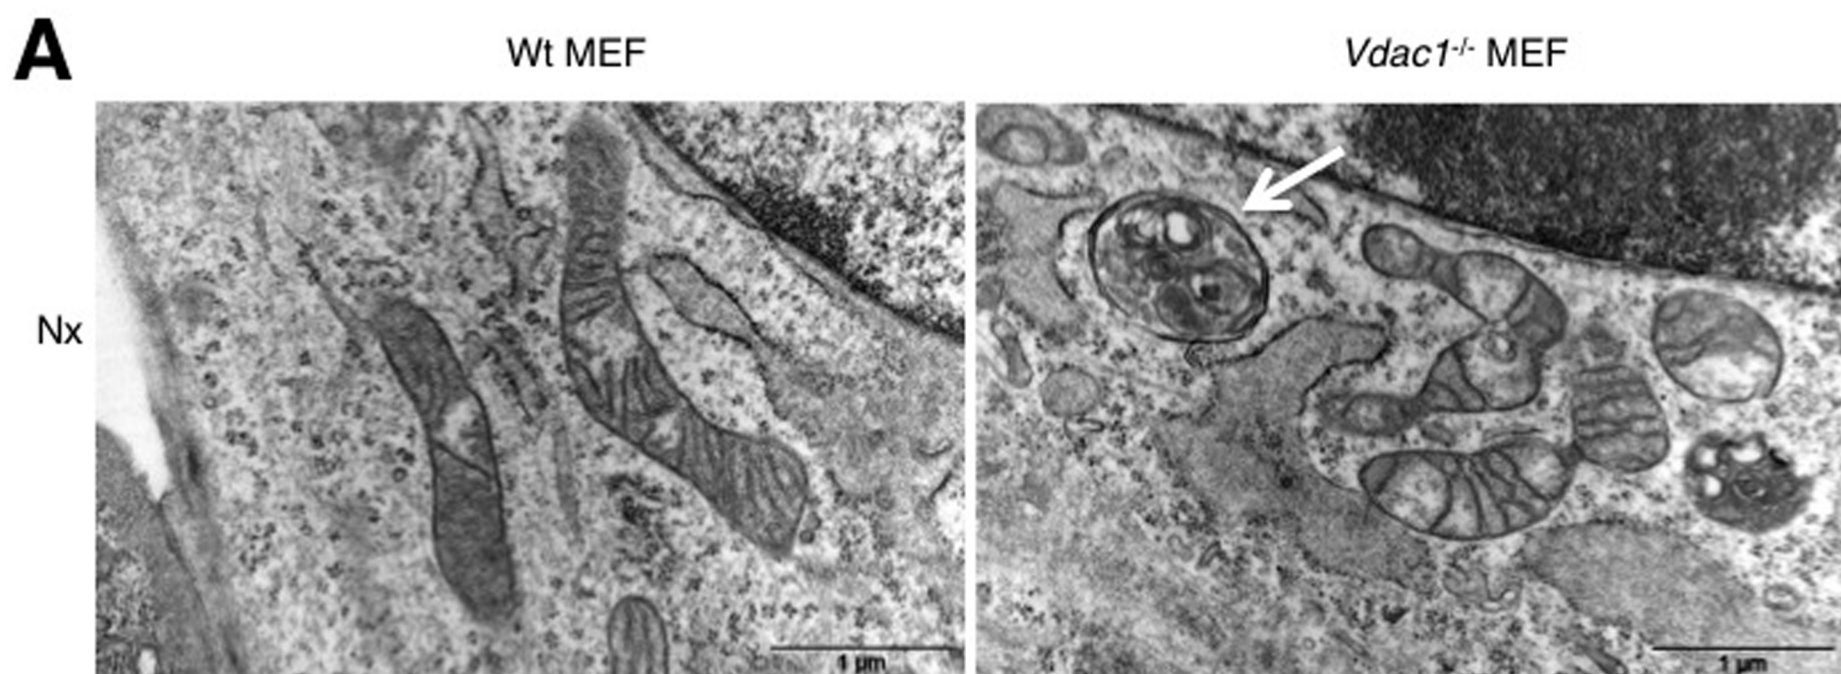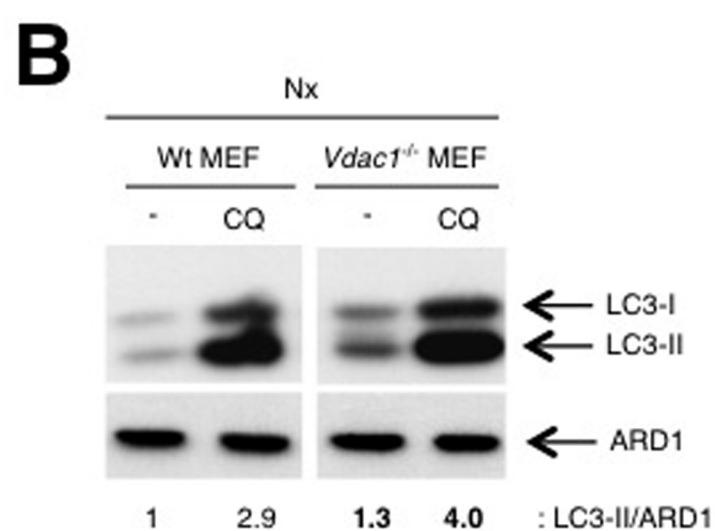

**Supplemental Figure S9. Autophagy was detected in *Vdac1*<sup>-/-</sup> MEF.** (A) Representative images of electron micrographs of Wt and *Vdac1*<sup>-/-</sup> MEF incubated in normoxia (Nx) for 24h. *Vdac1*<sup>-/-</sup> MEF showed autophagosomes with double membranes (arrow). (B) Wt and *Vdac1*<sup>-/-</sup> MEF lysates were analyzed in the absence (-) or presence of chloroquine (CQ) by immunoblotting to LC3. ARD1 was used as a loading control. The ratio of LC3-II/ARD1 was measured.
