# Supplementary material for: Knockout of Vdac1 activates hypoxia-inducible factor through reactive oxygen species generation and induces tumor growth by promoting metabolic reprogramming and inflammation
Source: PubMed Central journal article supplement (PMC4551760; doi:10.1186/s40170-015-0133-5), 2015-08-26
Supplement: 40170_2015_133_MOESM15_ESM.pdf [file 40170_2015_133_MOESM15_ESM.pdf]

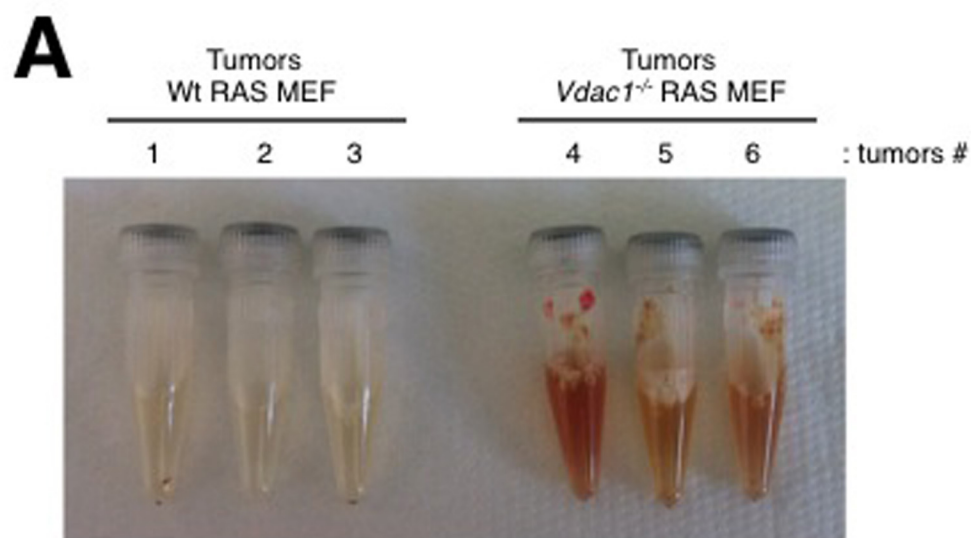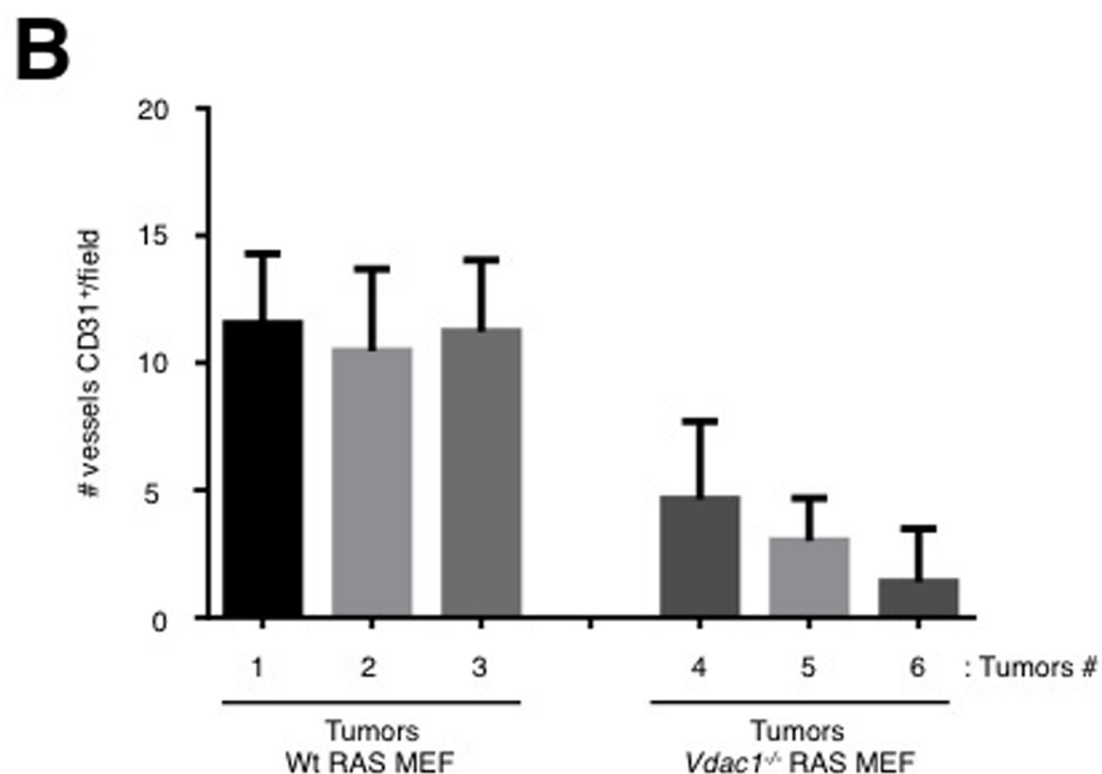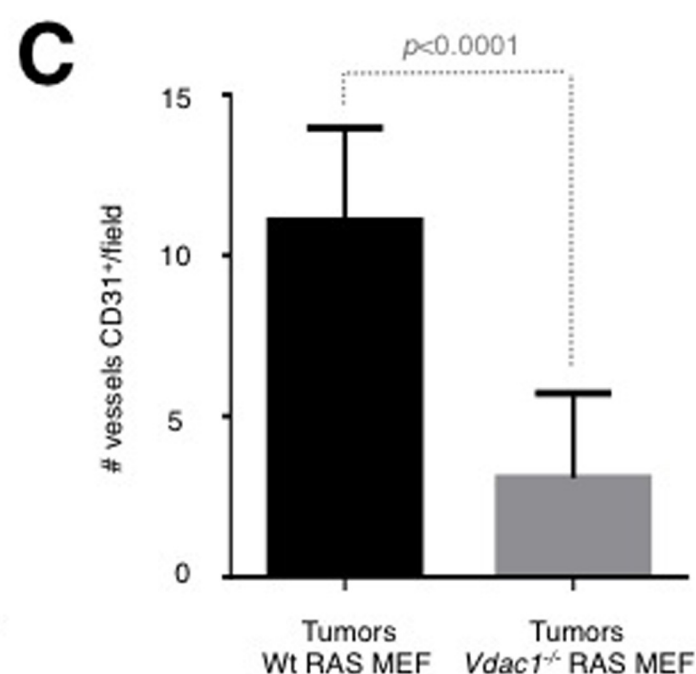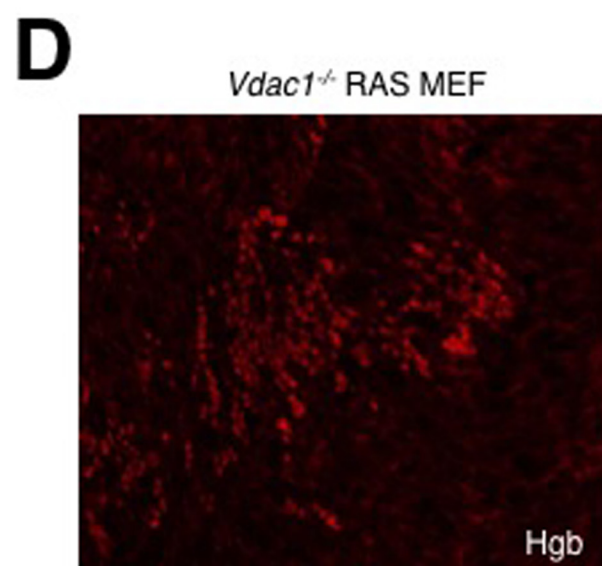

**Supplemental Figure S11. Red blood cells are present in *Vdac1*<sup>-/-</sup> RAS MEF tumor tissue.** (A) 20 mg of tumor tissue derived from Wt (1, 2 and 3) and *Vdac1*<sup>-/-</sup> RAS MEF (4, 5 and 6) tumors were resuspended in RLT buffer before DNA/RNA/protein extraction. (B) Quantification of the number of blood vessels/microscopic field of CD31-positive vessels  $\pm$  SEM of tumor tissue derived from Wt RAS (1, 2 and 3) and *Vdac1*<sup>-/-</sup> RAS MEF (4, 5 and 6). (C) Average of the quantification of CD31-positive vessels  $\pm$  SEM per microscopic field in Wt RAS MEF-derived tumors (Wt RAS MEF) and *Vdac1*<sup>-/-</sup> RAS MEF-derived tumors (*Vdac1*<sup>-/-</sup> RAS MEF). Statistical significance.  $p < 0.0001$ . (D)
