# Supplementary material for: Knockout of Vdac1 activates hypoxia-inducible factor through reactive oxygen species generation and induces tumor growth by promoting metabolic reprogramming and inflammation
Source: PubMed Central journal article supplement (PMC4551760; doi:10.1186/s40170-015-0133-5), 2015-08-26
Supplement: 40170_2015_133_MOESM16_ESM.pdf [file 40170_2015_133_MOESM16_ESM.pdf]

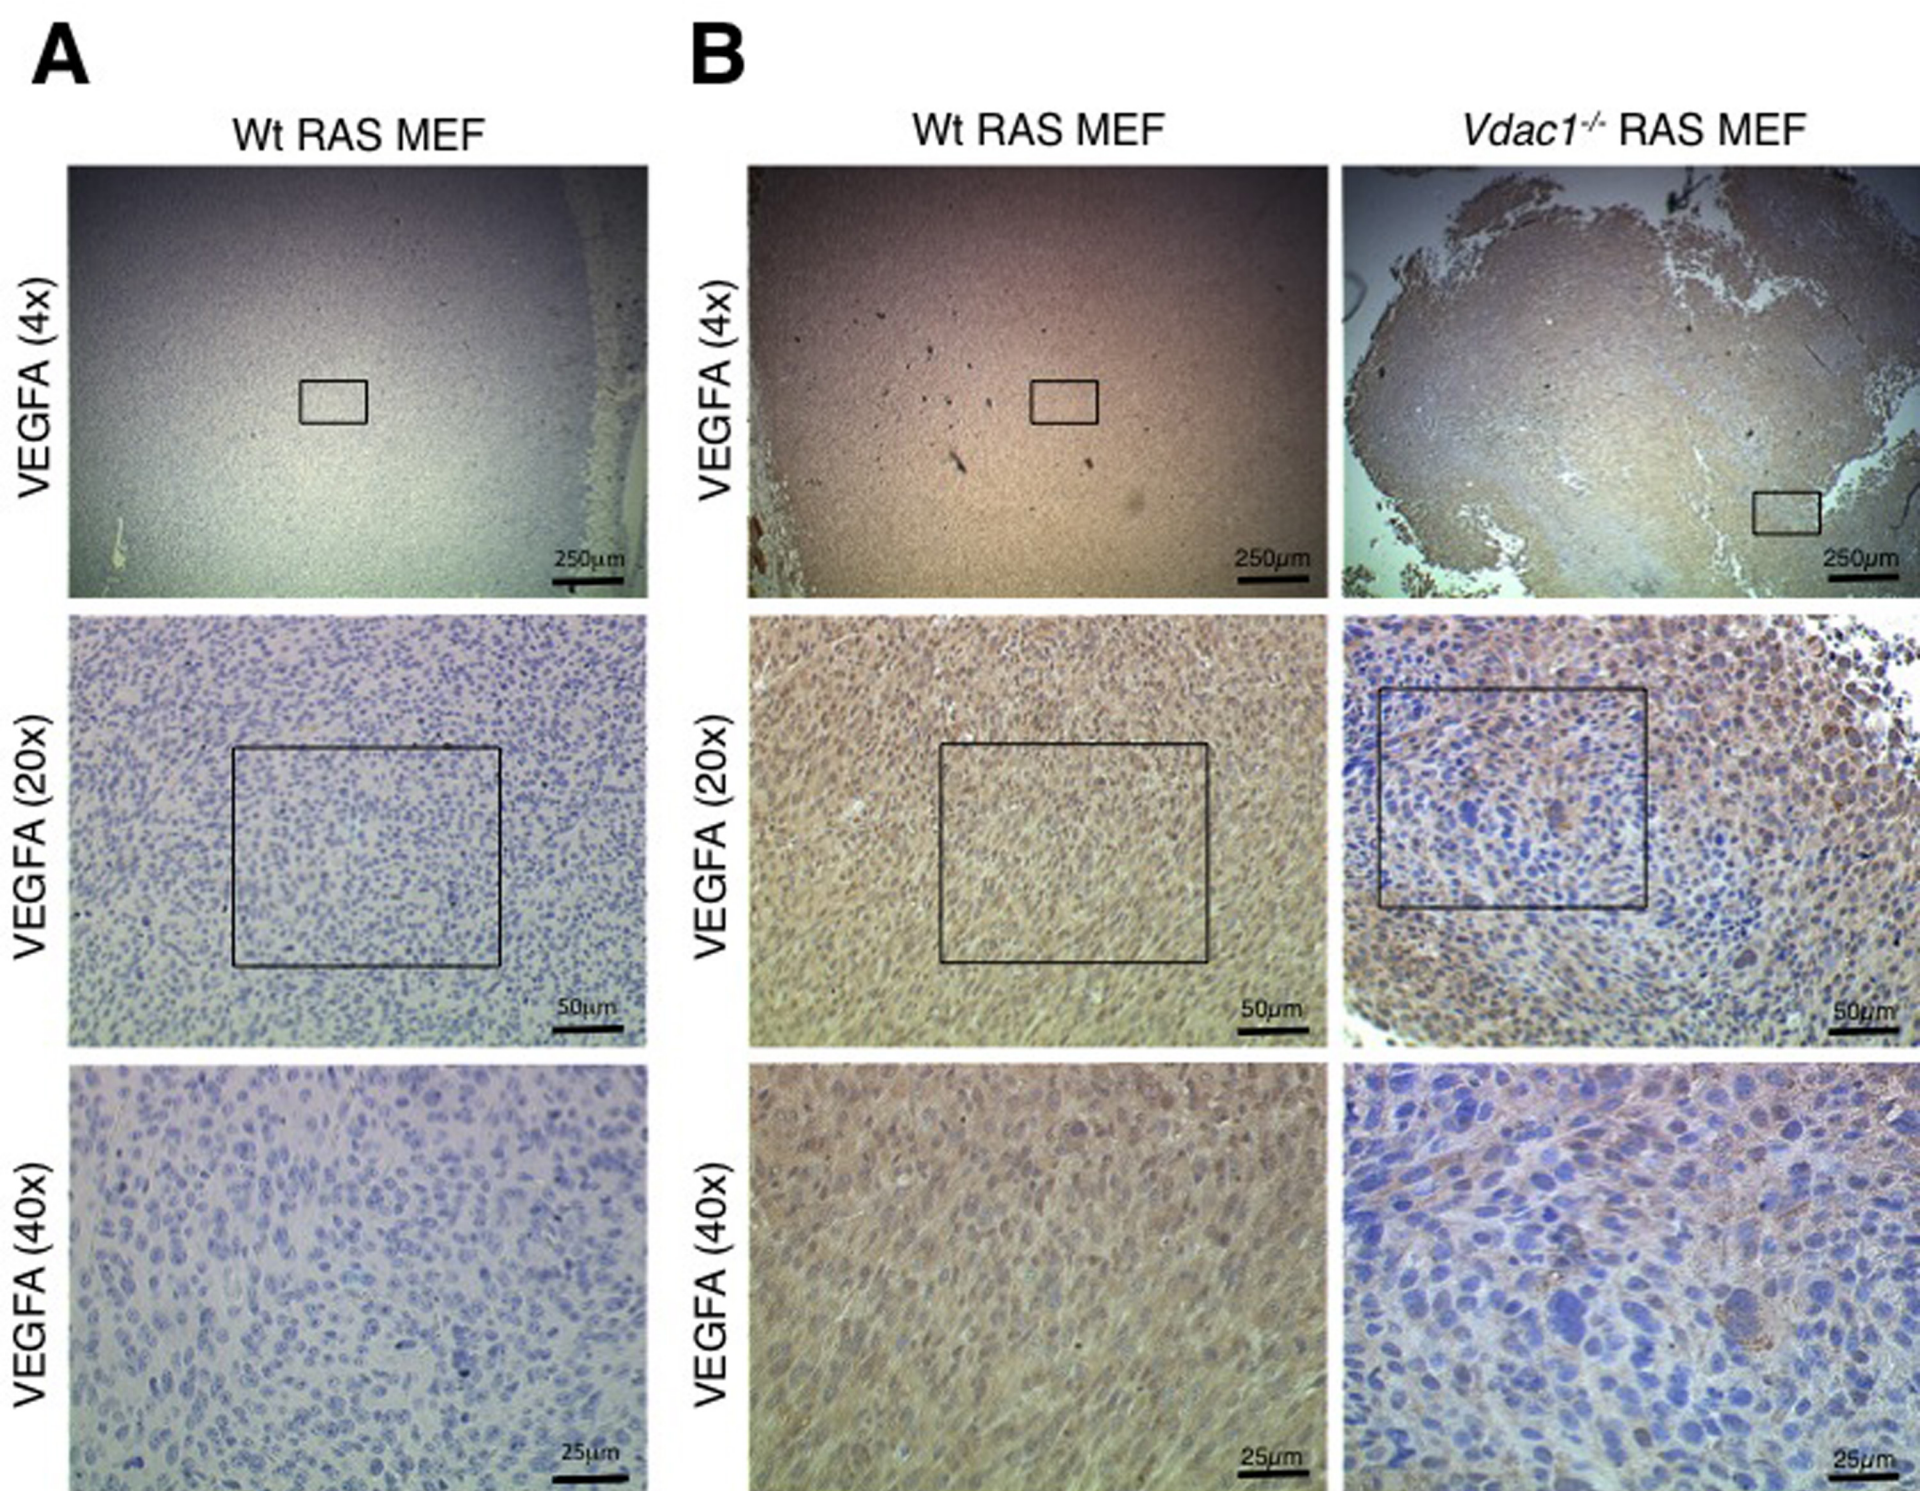

**Supplemental Figure S12. Immunohistochemical staining for VEGFA of tumor sections. (A)** Negative control using secondary antibody only on Wt RAS MEFs. **(B)** VEGFA immunodetection in sections of Wt and *Vdac1*<sup>-/-</sup> RAS MEF-derived tumor using 4X (top panels), 20X (middle panels) and 40X (bottom panels) magnification.
