# Supplementary material for: Knockout of Vdac1 activates hypoxia-inducible factor through reactive oxygen species generation and induces tumor growth by promoting metabolic reprogramming and inflammation
Source: PubMed Central journal article supplement (PMC4551760; doi:10.1186/s40170-015-0133-5), 2015-08-26
Supplement: 40170_2015_133_MOESM18_ESM.pdf [file 40170_2015_133_MOESM18_ESM.pdf]

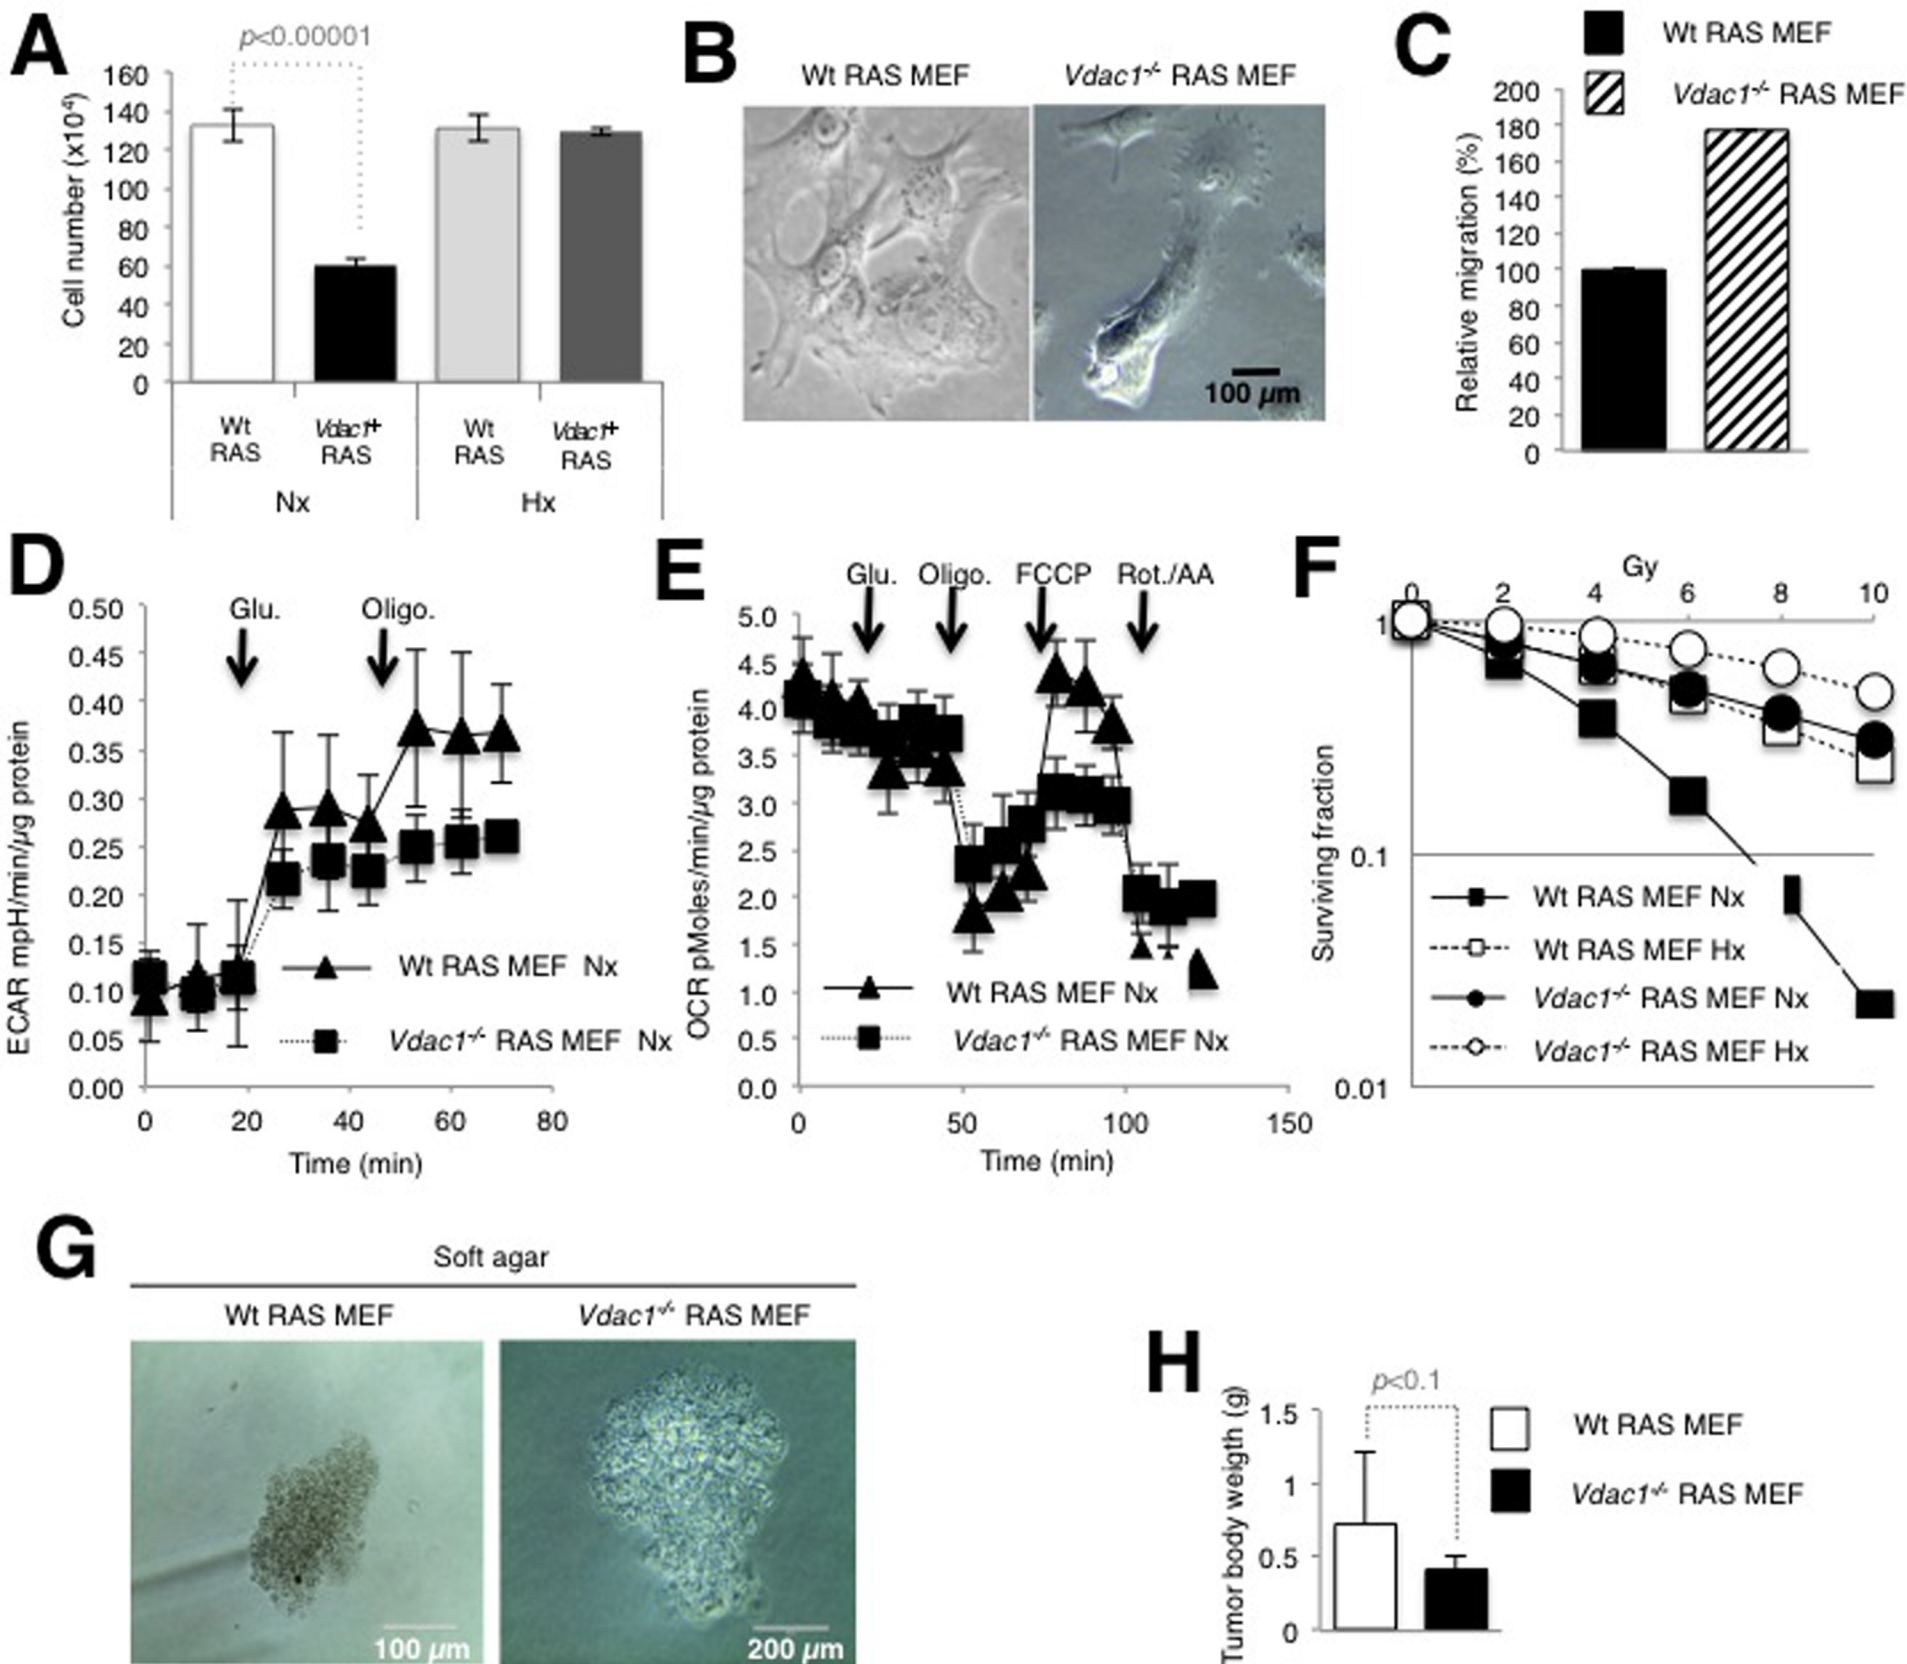

**Supplemental Figure S10. Characterization of RASV12 transformed MEF expressing (WT RAS MEF) or not (*Vdac1*<sup>-/-</sup> RAS MEF) *Vdac1*.** (A) Characterization of the growth of Wt and *Vdac1*<sup>-/-</sup> RAS MEF incubated in Nx or Hx for the indicated number of days. The mean  $\pm$ SEM is representative of four independent experiments carried out in duplicate. A  $p < 0.00001$  shows significant difference from the normoxia for *Vdac1*<sup>-/-</sup> RAS MEF. (B) Representative phase contrast photographs of Wt and *Vdac1*<sup>-/-</sup> RAS MEF incubated in Nx for 72h. Scale bars represent X  $\mu$ m. (C) Relative migration of Wt and *Vdac1*<sup>-/-</sup> RAS MEF in Nx as evaluated in a xCELLigence system. The mean  $\pm$ SEM is representative of two independent experiments carried out in quadruplicate. (D) The extracellular acidification rate (ECAR) in Nx of Wt and *Vdac1*<sup>-/-</sup> RAS MEF was evaluated with a Seahorse XF bioenergetic system. Glucose (Glu 10mM) and oligomycin (Oligo 1 $\mu$ M) were injected at the indicated times. (E) The oxygen consumption rate (OCR) in Nx for Wt and *Vdac1*<sup>-/-</sup> RAS MEF was measured in real time with a Seahorse XF. Glucose (Glu 10 mM), oligomycin (Oligo 1 $\mu$ M), carbonilecyanide p-trifluoromethoxyphenylhydrazone (FCCP 1  $\mu$ M) and Rotenone/Antimycine A (Rot/AA, 1 $\mu$ M/1 $\mu$ M) were injected at the indicated times. The mean $\pm$ SEM is representative of three independent experiments carried out in quadruplicate. (F) Radioresistance of Wt and *Vdac1*<sup>-/-</sup> RAS MEF cultured for 24h in Nx or Hx and treated with the indicated dose of radiation. Cell growth was then evaluated with a clonogenic cell survival assay. X-axis: dose of X-radiation (Gy). Y-axis: surviving fraction. The mean  $\pm$ SEM is representative of two independent experiments carried out in duplicate. (G) Soft agar assay of Wt and *Vdac1*<sup>-/-</sup> RAS MEF. (H) Tumor weight of Wt (Wt RAS MEF) and *Vdac1*<sup>-/-</sup> RAS MEF-derived tumors (*Vdac1*<sup>-/-</sup> RAS MEF).
